1 **Concomitant Pyroptotic and Apoptotic Cell Death Triggered**  
2 **in Monocytes Infected by Zika Virus**

3

4 Chunxia Wen<sup>1</sup>, Yufeng Yu<sup>1</sup>, Chengfeng Gao<sup>1</sup>, Xian Qi<sup>2\*</sup>, Carol J. Cardona<sup>3</sup>, Zheng  
5 Xing<sup>1,3\*</sup>

6

7 1 Medical School, Jiangsu Provincial Key Laboratory of Medicine, Nanjing  
8 University, Nanjing, China

9 2 Jiangsu Provincial Center for Disease Control and Prevention, Nanjing, China

10 3 Department of Veterinary Biomedical Sciences, College of Veterinary  
11 Medicine, University of Minnesota at Twin Cities, Saint Paul, MN 55108

12

13 To whom correspondence should be addressed:

14 Zheng Xing, PhD. Mailing address: 300D Veterinary Science Building,  
15 University of Minnesota at Twin Cities, 1971 Commonwealth Avenue,  
16 Saint Paul, MN 55108; E-mail: [zxing@umn.edu](mailto:zxing@umn.edu) Tel: (612) 626-5392;

17 Fax: (612) 626-5203 or

18 Xian Qi, PhD. Jiangsu Provincial Center for Disease Control and  
19 Prevention, Nanjing, Jiangsu; Email:

20 [qixiansyc@hotmail.com](mailto:qixiansyc@hotmail.com) Tel: (86) 025-83594532 (o)

21

22 **Running Title:** ZIKV Induces Pyroptosis in Monocytes

23 **Key words:** Zika virus; Pyroptosis; Monocytes; Caspase-1; ZIKV

24 **Word Count:** Abstract (228); Text (4,222)

25

26

27

28

29

30 **ABSTRACT**

31

32 Zika virus (ZIKV) is a positive-sense RNA flavivirus and can cause serious  
33 neurological disorders including microcephaly in infected fetus. As a mosquito-borne  
34 arbovirus, ZIKV enters bloodstream and is transmitted into the fetus through the  
35 placenta in pregnant women. Monocytes are considered one of the earliest blood cell  
36 types to be infected by ZIKV. As a first line defence, monocytes are crucial components  
37 in innate immunity and host responses and may impact viral pathogenesis in humans.  
38 Previous studies have shown that ZIKV infection can activate inflammasomes and  
39 induce proinflammatory cytokines in monocytes. In this report, we showed that ZIKV  
40 carried out a productive infection, which lead to cell death in human and murine  
41 monocytic cells. In addition to the presence of cleaved caspase-3, indicating that  
42 apoptosis was involved, we identified the cleaved caspase-1 and gasdemin D (GSDMD)  
43 as well as increased secretion of IL-1 $\beta$  and IL-18, suggesting that the inflammasome  
44 was activated that may lead to pyroptosis in infected monocytes. The pyroptosis was  
45 NLRP3-dependent and could be suppressed in the monocytes treated with shRNA to  
46 target and knockdown caspase-1, or an inhibited for caspase-1, indicating that the  
47 pyroptosis was triggered via a canonical approach. Our findings in this study  
48 demonstrate a concomitant occurrence of apoptosis and pyroptosis in ZIKV-infected  
49 monocytes, with multiple mechanisms involved in the cell death, which may have  
50 potentially significant impacts on viral pathogenesis in humans.

51

## 52 INTRODUCTION

53

54 Zika virus (ZIKV) is a member of *Flaviviridae* family, which includes a large  
55 group of viruses that cause West Nile encephalitis, Dengue Fever, Japanese encephalitis,  
56 Tick-borne encephalitis and other important human diseases (1). ZIKV infection is  
57 usually self-limited in most of cases, which are either asymptomatic or mild with only  
58 fever, rash, conjunctivitis and malaise. ZIKV has been associated with Guillain-Barre  
59 syndrome or other mild neurological symptoms in some adults (2) and caught the world  
60 attention when it was linked to congenital infections, leading to spontaneous abortions  
61 and severe neonatal birth defects including microcephaly when a severe outbreak  
62 occurred in South America in late 2015 to 2016 (3).

63 Innate immunity plays a critical role in the early phase of viral infections and  
64 host defense, in which monocytes and macrophages, originated from bone marrow  
65 myeloid progenitor cells are key players (4). Once an infection occurs, monocytes  
66 activate their phagocytic function and release a variety of cytokines and chemokines,  
67 which will further promote their activation and differentiation (5, 6). Monocytes can  
68 become macrophages when they egress from the bloodstream and reside into tissues and  
69 organs via chemotaxis. In addition to cytokine and chemokine release,  
70 monocytes/macrophages recruit lymphocytes and activate adaptive immunity through  
71 antigen presentation (7) and help clear viral infection in the host. On the other hand,  
72 monocytes infected with viruses are considered possible to serve as a Trojan horse under  
73 certain circumstances that promotes virus spread and leads to virus dissemination within

74 the host. More importantly, this could happen to bring viruses into the immune privileged  
75 tissues and organs such as the placenta, testes, and brain when monocytes migrate across  
76 protective blood barriers in the host (8). Indeed several studies indicated that monocytes  
77 could serve as virus reservoirs and facilitate virus dissemination and transmigration into  
78 the brain through blood-brain barrier (BBB) (9, 10).

79           Despite the viremia in blood of Zika patients, knowledge about the exact target  
80 cells and their responses in the blood during ZIKV infection remains limited. Blood  
81 CD14<sup>+</sup> monocytes appears to be the primary cells for ZIKV infection, which leads to  
82 differential immunomodulatory response or M2-skewed immunosuppression during  
83 pregnancy (11). A recent report shows that monocytes exhibit more adhesion molecules  
84 and abilities to attach onto the vessel wall and transmigrate across endothelia which  
85 promotes ZIKV dissemination to neural cells (12). Several studies have shown that ZIKV  
86 infection can activate the NLRP3 inflammasome, which results in the secretion of pro-  
87 inflammatory cytokines (13-15). These findings make it complicated to assess the role of  
88 monocytes in ZIKV infection, and in particular in viral pathogenesis in an infection  
89 during pregnancy. However, no study has shown what the fate is for the infected  
90 monocytes or whether these cells die of pyroptosis due to the inflammasome activation  
91 (13-16), while placental macrophages appear to be resistant to cell death during ZIKV  
92 infection (17).

93           Host cells can react by activating various innate defenses in response to viral  
94 infections. In addition to antiviral or pro-inflammatory cytokines and chemokines, cells  
95 could trigger programmed cell death with complex outcomes, which may eliminate infected

96 cells and clear virus replicative niche (18). Apoptosis and pyroptosis are caspase-  
97 dependent cell death and necroptosis is activated relying on the activation of  
98 phosphorylated receptor interacting serine/threonine-protein kinase (RIPK)(19-23). In  
99 this report, we showed the evidence that a productive ZIKV infection led to cell death in  
100 both human and murine monocytes. Our data indicated that the infected monocytes died  
101 of apoptosis and pyroptosis with the presence of cleaved caspase-1 and caspase-3 and  
102 processed GSDMD. The pyroptosis in human and murine monocytes was dependent on  
103 the NLRP3 inflammasome activation induced by ZIKV infection. Although previous  
104 studies have indicated the significance of the inflammasomes in proinflammatory  
105 cytokine responses(13-16) and inhibition of the cGAS-mediated interferon signaling in  
106 ZIKV monocytes (13), concomitant apoptosis and pyroptosis may benefit the host by  
107 removing a virus shelter and preventing viral spreading and disseminating, which could  
108 be of significance to viral pathogenesis in human ZIKV infection.

109

## 110 **MATERIALS AND METHODS**

111

### 112 *Cell Lines and Cultures*

113 THP-1 cells and human embryonic kidney cells (HEK293T) were purchased  
114 from the Cell Bank of Chinese Academy Sciences (Shanghai, China). RAW264.7 cells  
115 were purchased from the American Type Culture Collection (ATCC). RAW264.7 and  
116 HEK293T cells were cultured in Dulbecco's modified Eagle's medium (DMEM) (Gibco,  
117 Grand Island, NY) supplemented with 10% fetal bovine serum (FBS, ExCell Bio.,

118 China), 100 U/ml penicillin, and 100 µg/ml streptomycin sulphate (Beyotime  
119 Biotechnology, China). Cells were cultured in an incubator at 37°C with a humidified  
120 atmosphere of 5% CO<sub>2</sub>.

121

## 122 *Reagents and Antibodies*

123 ZIKV-E antibody (#B1845) was purchased from Beijing Biodragon Immunotech  
124 (Beijing, China). Antibodies for pro-caspase-1 antibody (#ab179515), phospho-MLKL  
125 (#ab187091), phospho-RIPK3 (#209384) and GSDMD (#ab210070) were purchased  
126 from Abcam (Cambridge, MA). Another GSDMD antibody (#A10164) was purchased  
127 from ABclonal. Antibodies for NLRP3 (#D4D8T), pro-caspase-3 (#9555S), cleaved  
128 caspase-3 (#9664S), pro-PARP (#9532S), cleaved-PARP (#9541S), and phospho-RIPK1  
129 (#44590S) were purchased from Cell Signalling Technology (Beverly, MA). We also  
130 purchased antibodies for cleaved caspase-1 (#AF4022) from Affinity Biosciences  
131 (Taizhou, China) and GAPDH and β-actin from Proteintech (Wuhan, China). An MTT  
132 Assay Kit was purchased from SunShineBio (Nanjing, China). ELISA kits for mouse  
133 interleukin-1β, mouse interleukin-18, human interleukin-1β, and human interleukin-18  
134 were purchased from BOSTER (Wuhan, China). Compounds VX765, ZVAD-FMK,  
135 GSK'872, Nec-1s, and Phorbol-12-myristate-13-acetate (PMA) were purchased from  
136 Selleck. RNAiso plus reagent was purchased from TAKARA.

137

## 138 *Virus Infection*

139 In this study ZIKV SZ01 strain (GenBank: KU866423), a gift from Dr Shibo

140 Jiang of Fudan University, was used. THP-1 cells were activated with 100 nM PMA for  
141 24 to 48hrs (24). THP-1 and RAW264.7 cells were inoculated with 1 MOI of ZIKV SZ01  
142 for infection at 37°C for 12 to 48 hrs. Cell medium was collected and cell lysates or total  
143 RNA were prepared for further analyses.

144

#### 145 *MTT Assay for Cell Viability*

146 PMA-activated THP-1 cells and RAW264.7 cells were inoculated with ZIKV  
147 (0.01, 0.1 or 1 MOI) for 12, 24, 36 and 48 hrs prior to addition of 3-(4,5)-  
148 dimethylthiaziazolo (-z-y1)-3,5-di phenyltetrazoliumromide (MTT) for another 4 hrs. Cell  
149 viability was determined as a ratio of absorbance at OD<sub>570</sub> of ZIKV-infected cells to  
150 uninfected cells. The assay was carried out at least three times for each group. Unpaired  
151 Student's t-test was used to evaluate the data. The data shown are the mean ± SD of three  
152 independent experiments. \*P<0.05, \*\*\*P< 0.001.

153

#### 154 *Quantitative Realtime PCR*

155 Total RNA was extracted with RNAiso plus reagent for quantitative realtime  
156 PCR (QPCR) following the manufacture's manual. QPCR was performed with 1µl of  
157 cDNA in a total volume of 20µl with SYBR Green QPCR Master Mix (Vazyme)  
158 according to the manufacturer's instructions. QPCR primers were designed by Primer  
159 Premier 5.0. Relative gene expression levels were normalized by β-actin housekeeping  
160 gene. Relevant fold change of each gene was calculated by following the formula:  $2^{\Delta\text{Ct of gene} - \Delta\text{Ct of } \beta\text{-actin}}$  (ZIKV infected cells) /  $2^{\Delta\text{Ct of gene} - \Delta\text{Ct of } \beta\text{-actin}}$  (ZIKV - uninfected cells).  
161

162

### 163 *Lentivirus Packaging for shRNA*

164 Lentivirus vectors were obtained from Shanghai Jiao Tong University. The  
165 negative control was a pLKO.1 vector containing sequences encoding shRNA. To ensure  
166 knockdown efficiency, we selected three shRNA sequences for each targeted gene. The  
167 sense sequences for pro-caspase-1 shRNA are: CTCTCATTATCTGCAATGA,  
168 AGCGTAGATGTGAAAAAAA, and CCAGATATACTACA ACTCA. The sense  
169 sequences for NLRP3 shRNA are: TCGAGAATCTCTATTTGTA,  
170 ACGCTAATGATCGACTTCA, and AGGAGAGACCTTTATGAGA. PMA-activated  
171 THP-1 cells were infected with the recombinant lentiviruses expressing shRNAs  
172 targeting pro-caspase-1 or NLRP3. 48 hrs later, the culture medium was discarded and  
173 the cells were inoculated with ZIKV at 1 MOI. The culture medium and cell lysates were  
174 harvested at indicated time points for enzyme-linked immunosorbent assay (ELISA) and  
175 western blot analyses.

176

### 177 *ELISA and Western Blot Analysis*

178 Secretion of cytokine IL-1 $\beta$  and IL-18 in culture medium was measured using  
179 commercial ELISA kits. Each group of testing was replicated for three times and  
180 resultant data were analysed by Student's t-test. Cell lysates from the THP-1 (wild type,  
181 knockdown cells for NLRP3 and pro-caspase-1) and RAW264.7 (wild type and knockout  
182 cells for NLRP3) cells were prepared by RIPA lysis buffer with 1% PMSF. Protein  
183 concentrations were determined by a Bradford assay (BCA). Cell lysates (40  $\mu$ g) were



184 electrophoresed in 10-15% SDS-PAGE and the proteins transferred to a PVDF  
185 membrane for subsequent western blot analyses. Protein signals on the membrane were  
186 visualized by a GelCap ECL analyzer (Canon).

187

### 188 *Confocal Immunofluorescence*

189           ZIKV-infected THP-1 or RAW264.7 cells on chamber slides were fixed by 4%  
190 paraformaldehyde at room temperature for 15 min and permeabilized with 0.1% Triton-  
191 X-100 for 10 min. The cells were washed three times with PBS and then blocked with  
192 5% BSA for 1 hr at room temperature. The cells were then incubated with an antibody for  
193 GSDMD overnight at 4°C, followed by four washes with PBS. The slides were incubated  
194 with Alexa Fluor 594-conjugated Affinipure goat-anti-rabbit IgG (H+L) (Proteintech) for  
195 1hr at room temperature. After four more washes, the cells were incubated with DAPI  
196 solution for 10 min to stain the nuclei. The cells were finally analysed under a confocal  
197 laser scanning microscope (FV3000, Olympus).

198

### 199 *Statistical Analysis*

200           Student's t-test was used to evaluate the data. The data shown are the mean  $\pm$ SD  
201 of three independent experiments. The differences with a value of  $p < 0.05$  were  
202 considered statistically significant.

203

## 204 **RESULTS**

205

## 206 *Infection of ZIKV in Monocytes Triggered Cell Death*

207           As an arbovirus, ZIKV enters bloodstream and may infect and replicate in some  
208 blood cells. We chose monocytes, which are susceptible to ZIKV as reported previously,  
209 for infection to examine the ultimate fate of the infected cells. Two monocytic cell lines,  
210 THP-1 (human) and RAW264.7 (mouse), were pre-treated with PMA, followed by  
211 inoculation of ZIKV virus at 1 MOI. Morphological changes were observed under a  
212 microscope, which showed that the cells became swelling, detached, and their membrane  
213 deteriorated. Eventually the cell body broke up into debris after 24 or 48 hrs post  
214 infection (p.i.) (Figure 1A-B). The cell death caused by ZIKV infection was dose  
215 dependent. When the cells were infected with the virus at MOIs of 0.01, 0.1, or 1, cell  
216 death occurred at various time points p.i. and more death was observed in the culture  
217 infected with higher amount of viral doses (Figure 1C-D). To confirm that a productive  
218 infection occurred, we detected viral RNA replication which showed that viral E gene  
219 copy numbers increased over time p.i. by realtime RT-PCR in both THP-1 and  
220 RAW264.7 cells (Figure 1E-F). Viral E protein could also be detected starting mainly at  
221 12 hrs p.i. in the infected cells (Figure 1G-H).

222

## 223 *Programed Cell Death Induced in Monocytes with ZIKV Infection*

224           We tried to understand the mechanism about how the monocytes died in  
225 response to ZIKV infection. THP-1 and RAW264.7 cells were pre-treated with ZVAD-  
226 FMK (40  $\mu$ M), Nec-1s (50  $\mu$ M), and GSK'872 (20 nM), the inhibitors for pan-caspases,  
227 RIPK1, and RIPK3, respectively, followed by infection with ZIKV. First, we observed

228 the cell morphological changes in infected cells with or without the treatment of  
229 inhibitors. In the cells untreated with the inhibitors, the infected cells underwent cell  
230 death. It appeared that ZVAD-FMK could relieve the cell death in both THP-1 and  
231 RAW264.7 cells, although Nec-1s or GSK'872 had no apparent impact on the cell death  
232 at 24 and 48 hrs p.i. (Figure 2A-B), indicating that caspases could be involved in the cell  
233 death. We quantified the cell death by measuring cell viabilities with an MTT assay. The  
234 treatment with ZVAD-FMK significantly relieved the monocytes from cell death at 24  
235 and 48 hrs p.i. in both THP-1 (Figure 3A) and RAW264.7 (Figure 3B) cells. On the other  
236 hand, the treatment with Nec-1s did not relieve the cells from death until 48 hrs p.i. in  
237 THP-1 cells and had no effect on cell death in RAW264.7 cells; the treatment with  
238 GSK'872 did not reverse cell death in both THP-1 and RAW264.7 cells. Taken together,  
239 these data suggest that caspases, but not RIPKs, may play a role in the cell death  
240 triggered by ZIKV infection.

241 We analysed the cell lysates prepared at various time points p.i. from the  
242 infected cells for western blot analyses. As shown in supplemental Figure S1, pro-caspase  
243 3 was cleaved and activated, together with the presence of the cleaved substrate PARP, at  
244 the early stage of infection, confirming that apoptosis was activated in ZIKV-infected  
245 monocytes. We could also detect increased phosphorylation of RIPK1 and RIPK3, as  
246 well as phosphorylated MLKL, which indicates an activation of necroptosis. However,  
247 the activation of RIPKs may not have efficiently triggered a programmed necrosis. These  
248 data suggest that caspases-dependent programmed cell death could be the main cause  
249 involved in ZIKV-infected monocytes.

250

251 *Pyroptosis was induced in both human and murine monocytes during ZIKV*  
252 *infection*

253           Considering that caspases are involved in not only apoptosis but also pyroptosis,  
254 we decided to examine what types of caspases were required for the cell death in ZIKV-  
255 infected monocytes. Pro-caspase-1 was activated as shown in the early studies indicating  
256 that inflammasomes were activated in monocytes. We confirmed that in both THP-1 and  
257 RAW264.7 cells (Figure 4A-B) pro-caspase-1 was processed and cleaved caspase-1 was  
258 detected at various time points p.i. by western blot analyses. In fact, expression of pro-  
259 caspase-1 was upregulated in both cell lines after ZIKV infection. In addition, GSDMD, a  
260 substrate of caspase-1, was cleaved to become cleaved GSDMD, an executor of  
261 pyroptosis, indicating that ZIKV infection activated inflammasomes, and induced  
262 pyroptosis in monocytes, probably via a caspase-1-dependent canonical pathway.  
263 Quantitative analyses showed the significant pro-caspase-1 upregulation (Figure 4C-D)  
264 and increases of cleaved caspase-1 (Figure 4E-F) and GSDMD (Figure 4 G-H) in  
265 infected THP-1 and RAW264.7 cells than in the cells uninfected.

266

267 *Upregulation of the Components for Inflammasome Formation and Its*  
268 *Activation in ZIKV-infected Monocytes*

269           We examined the transcription and post-transcriptional processing of the  
270 inflammasome components in infected cells. RNA transcripts of the pro-caspase-1  
271 (Figure 5A & D), NLRP3 (Figure 5B & C), and ASC (Figure 5 C & F) genes increased

272 significantly over the time p.i. in both human and murine monocytes infected with ZIKV.  
273 We also examined the transcripts of pro-IL-1 $\beta$  and pro-IL-18 and found their RNA copy  
274 numbers increased as well in infected THP1 (Figure 6 A-B) and RAW264.7 cells (Figure  
275 6 C-D). We confirmed that IL-1 $\beta$  and IL-18 were released to the culture medium of the  
276 infected THP-1 (Figure E-F) and RAW264.7 (Figure G-H) cells by ELISA.

277

### 278 *Inflammasome Activation Led to Cell Death Induced by ZIKV in monocytes*

279 Pyroptosis can be triggered by processing of pro-caspase 1 via a canonical  
280 inflammasome activation, or processing of pro-caspase 4, 5, or 11 via a non-canonical  
281 approach. To confirm the mechanism for pyroptosis that occurred in monocytes infected  
282 with ZIKV, we chose to use Belnacasan, or VX-765, a specific caspase-1 inhibitor to pre-  
283 treat the cells prior to viral infection. Cell lysates were prepared at various time points p.i.  
284 for western blot analyses. As shown in Figure 7, cleaved caspase-1 did not appear or the  
285 level of cleaved caspase-1 was greatly reduced in VX765-treated monocytes, in  
286 comparison to the cells without treatment, indicating that VX765 effectively suppressed  
287 the activation of pro-caspase-1 in infected THP-1 (Figure 7A) and RAW264.7 (Figure  
288 7B) cells. We examined the morphology of infected THP-1 and RAW247.1 cells at 48  
289 hrs p.i. with or without the treatment of VX765. The amount of the cells with sick  
290 morphology increased significantly in both THP-1 (Figure 7C) and RAW247.1 (Figure  
291 7D) cells, which were pre-treated with VX756, indicating that pro-caspase-1 cleavage or  
292 activation of inflammasomes was critical to triggering pyroptosis in ZIKV-infected  
293 monocytes.

294 To ascertain the inflammasome activation to be inhibited, we detected the  
295 secretion of IL-1 $\beta$  in infected monocytes, pre-treated with or without VX765. The  
296 increase of IL-1 $\beta$  in infected cells was significantly suppressed at 36 and 48 hrs p.i. in  
297 VX765 pre-treated cells, compared to the cells without the treatment (Figure 7E-F).

298 We further used a small hairpin RNA (shRNA) approach to confirm the role of  
299 the inflammasome activation involved in the cell death. Three shRNA molecules,  
300 targeting pro-caspase-1, were tested in THP-1 cells to knock down pro-caspase-1  
301 transcription. The expression of pro-caspase-1 was suppressed in the cell lines, which  
302 were selected and expanded, as shown in Figure 8A. The caspase-1 knockdown (KD) cell  
303 lines were infected with ZIKV and cell lysates were prepared at various time points p.i.  
304 for western blot analysis, which showed little expression of pro-caspase-1, barely  
305 detectable cleaved caspase-1, and no detection of cleaved GSDMD, a pattern distinct  
306 from those in the control cells infected with ZIKV (Figure 8B). Cell viability was  
307 measured by an MTT assay and significant cell death occurred in ZIKV-infected cells at  
308 36 and 48 hrs p.i. However in pro-caspase-1 KD cells, the cell death was reversed  
309 significantly in the absence of pro-caspase-1 (Figure 8C), indicating that the pyroptosis,  
310 that occurred in ZIKV-infected monocytes, was caspase-1 dependent via a canonical  
311 pathway.

312 To ascertain the effect on the inflammasome activation by pro-caspase-1 KD in  
313 the cells, we measured the increase of IL-1 $\beta$  which was significantly suppressed at 36  
314 and 48 hrs p.i., compared to the infected control cells without pro-caspase-1 KD,  
315 confirming that the pro-caspase-1 KO was sufficient in suppressing the inflammasome

316 activation in ZIKV-infected monocytes (Figure 8D).

317

### 318 *The NLRP3 Inflammasome Was Essential to ZIKV-induced Pyroptosis*

319 As described earlier, NLRP3 was transcriptionally upregulated in human  
320 monocytes infected with ZIKV. To confirm the role of the NLRP3 inflammasome  
321 activation in pyroptosis, we carried out the shRNA knockdown of NLRP3 in THP-1 cells.  
322 Three shRNA molecules, targeting NLRP3, were tested in THP-1 cells to knock down  
323 NLRP3 transcription. The cell lines were selected and examined for their knockdown  
324 efficacy. The result with efficient knockdown of NLRP3 was shown in Figure 9A. The  
325 NLRP3 knockdown (KD) cells were infected with ZIKV and cell lysates were prepared  
326 for western blot analysis. In infected control cells, pro-caspase-1 was processed and  
327 cleaved GSDMD was produced, but in infected KD cells, pro-caspase-1 was barely  
328 processed and cleaved GSDMD was not produced (Figure 8B), indicating that the  
329 pyroptosis, triggered in infected monocytes, was dependent on the NLRP3 inflammasome  
330 activation, a canonical approach, leading to processing of pro-caspase 1.

331 Cell viability was measured in NLRP3 KD cells after infection with MTT assay.  
332 As shown in Figure 9C, significant cell death occurred at 36 and 48 hrs p.i. in infected  
333 control cells but the cell death was effectively suppressed in the NLRP3 KD cells  
334 infected with ZIKV.

335 To confirm that the NLRP3 inflammasome activation was impaired in the  
336 NLRP3 KD cells, we further measured the secretion of IL-1 $\beta$  in infected control and  
337 NLRP3 KD cells by ELISA, which showed that the increase of IL-1 $\beta$  secretion in the

338 culture medium was significantly reduced in the NLRP3 KD cells (Figure 9D). In sum,  
339 these data demonstrate that the activation of the NLRP3 inflammasome led to pyroptosis,  
340 which was dependent on activated caspase-1 in ZIKV-infected monocytes

341

## 342 **DISCUSSION**

343

344 ZIKV causes asymptomatic or mild infections, which are self-limited in most  
345 adults, indicating that host immunity can contain the infection effectively in most adults.  
346 However, ZIKV can disseminate through bloodstream to the placenta in some pregnant  
347 women and penetrate the blood-placenta barrier (BPB) into fetus, in which the virus  
348 invades the neural tissues due to its neurotropism. What role monocytes play in  
349 facilitating the virus to penetrate the BPB barrier and eventually infect the fetal brain  
350 remains to be investigated. In this study, we confirmed that both human and murine  
351 monocytes were susceptible to ZIKV, and a productive replication led to cell death. The  
352 cell death could be observed at 12 hrs p.i., and continued to eventually deteriorate the  
353 whole cell culture, suggesting that ZIKV caused a lytic infection in monocytes in addition  
354 to released proinflammatory cytokines and chemokines as shown in this and previous  
355 studies. We were able to identify that apoptotic process was triggered upon ZIKV  
356 infection, which also occurs in monocytes infected with many types of viruses (25-29).

357

358 Previous studies have shown that ZIKV infection activates the NLRP3  
359 inflammasome, which leads to processing of pro-caspase-1 and secretion of IL-1 $\beta$  in



360 infected monocytic cell lines, PBMC, or monocyte-derived macrophages (13-15, 17).  
361 Interestingly, none of these studies have pursued to observe or detect pyroptosis induced  
362 in infected monocytes or macrophages. In this report we showed the occurrence of  
363 pyroptosis, in addition to apoptosis, in ZIKV-infected monocytes. As reported previously,  
364 we showed that pro-caspase-1 was cleaved and the secretion of cytokines IL-1 $\beta$  and IL-  
365 18 increased, indicating that inflammasomes were activated in monocytes. Cleaved  
366 GSDMD, an executor of pyroptosis, was further detected, suggesting that a considerable  
367 amount of cell death in ZIKV-infected monocytes was attributed to pyroptosis, which  
368 could be suppressed in the cells, pre-treated with an inhibitor for caspase-1 or shRNA to  
369 knockdown caspase-1. We finally showed that the NLRP3 inflammasome activation was  
370 required for pyroptosis via a canonical approach in ZIKV-infected monocytes, which was  
371 dependent on caspase-1 in infected human and murine monocytes.

372

373           Monocytes and macrophages are important in viral infections. As haemopoietic  
374 cells originated in bone marrow, monocytes comprise about 10% of blood leukocytes.  
375 They are released into peripheral circulation and live for a few days in blood vessels of  
376 the body. Monocytes penetrate through the wall of vessels and reside in the tissues and  
377 organs, through chemotaxis when microbial infection occurs, and differentiate into  
378 macrophages. Monocytes are susceptible to many viruses in various families. Human  
379 monocyte-derived macrophages can be infected by Coxsackieviruses CV-B4(30), which,  
380 however, can poorly infect human monocytes, unless a non-neutralizing anti-CV-B4 IgG  
381 is present (31). Replication of neurovirulent poliovirus strains in monocytes was

382 associated to their pathogenesis in the central nervous system (32). Monocytes and  
383 macrophages play critical roles in HIV transmission, viral spread early in the host, and  
384 being a reservoir of virus throughout infection (8).

385

386         Circulating monocytes are the primary cellular target of ZIKV infection in  
387 humans. Not only can monocytes be infected dominantly in PBMC by ZIKV in vitro, but  
388 the virus can also be found in monocytes collected during acute illness from Zika patients  
389 (11, 33). ZIKV viral RNA can be detected in the monocytes longer than in the serum of  
390 infected patients, indicating that monocytes could serve as a virus reservoir during the  
391 infection (33). Interestingly, infection of monocytes by ZIKV leads to cell expansion to  
392 become more intermediate or non-classical type by expressing CD16 (11, 33). Moreover,  
393 monocytes infected with ZIKV tend to secrete IL-10, an immunosuppressive cytokine,  
394 which could skew the host immune response during the early stage of pregnancy (11).  
395 These reports collectively support that monocytes may play a complicated role in viral  
396 pathogenesis on ZIKV spread and neuropathogenesis. In this sense, programmed cell death  
397 in ZIKV-infected monocytes, not reported previously to our knowledge, may be  
398 beneficiary to the host as a protective defence by eliminating the virus reservoir in the  
399 host.

400

401         Programmed cell death can be triggered in monocytes infected with other  
402 flaviviruses. It has been observed that dengue virus (DENV) can induce apoptosis in  
403 infected monocytes, which is related to increased TNF- $\alpha$  induction (29). In fact all four

404 serotypes of DENV can induce apoptosis in human monocytes, dependent on activation  
405 of caspase 7, 8, and 9 (34). On the other hand, DENV can also trigger pyroptosis, which  
406 is associated with an activation of caspase-1 and release of IL-1 $\beta$  (35). In this report our  
407 data demonstrate that a concomitant apoptosis and pyroptosis were induced in ZIKV-  
408 infected human and murine monocytes. It was reported that the NLRP3 inflammasome  
409 activation, triggered by ZIKV infection in monocytes, promotes the cleavage of cGAS,  
410 resulting in the inhibition of initiating type I IFN signaling, and enhances viral replication  
411 (13). We believe that subsequent pyroptotic cell death, caused by the NLRP3  
412 inflammasome activation, or caspase-3 dependent apoptosis as shown in our data may  
413 help shorten or clear viral replicative locales and rid the viral carrier in the host. The  
414 programmed cell death may be also significant in preventing the virus from spreading to  
415 the placenta for infecting fetal chorionic villi during pregnancy.

416

417 Little is known about why an infected cell chooses one way or another to die. In  
418 contrast to apoptosis, pyroptosis and necroptosis are inflammatory, leading to massive  
419 damage of involved tissues. Cross-talk occurs between signaling pathways of the  
420 programmed cell deaths, which may provide a mechanism for regulating cell fate. We  
421 have identified that monocytes are programmed to pyroptosis and apoptosis in response  
422 to ZIKV infection. Since ZIKV nonstructural protein NS5 is required for NLRP3  
423 activation (15), the pyroptosis is therefore very likely to be triggered by viral protein NS5  
424 in monocytes. We cannot determine the exact mechanism about how apoptosis is induced  
425 but very likely the induction of TNF- $\alpha$  (36) in infected monocytes plays an important

426 factor in activating the cascade of caspases leading to the processing of pro-caspase-3.

427 We have no clue at this stage whether these programmed cell death pathways may regulate

428 each other in ZIKV-infected monocytes. Even though caspase-3 can cleave GSDMD,

429 leading to pyroptosis (37), we showed in this study that ZIKV-triggered pyroptosis in

430 monocytes was caspase-1 dependent via a canonical approach. Our data in this report

431 may help us further understand the complicated functions how monocytes are involved in

432 viral pathogenesis in ZIKV-infected humans.

433

434

435

436

437

438

439

440

441

442

443

444

445

446

447

448 **ACKNOWLEDGEMENTS**

449 We are grateful to Dr. Shibo Jiang, Fudan University, for the Zika virus  
450 strain used in the study.

451

452 **CONFLICT OF INTEREST**

453 The authors declare that they have no conflicts of interest with the contents  
454 of this article.

455

456 **AUTHOR CONTRIBUTIONS**

457 CXW and ZX conceived and coordinated the study. CXW, YFY, and CFG  
458 designed, performed and analyzed the experiments shown in Figures 1 through 9.  
459 XQ provided reagents, technical assistance and contributed to completion of the  
460 studies. CXW, CJC and ZX wrote the paper. All authors reviewed the results and  
461 approved the final version of the manuscript.

462

463

464 **DATA AVAILABILITY**

465 The datasets used and/or analyzed during the current study are available  
466 from the corresponding author on reasonable request.

467

468

469

470

471 **REFERENCES**

472

- 473 1. Hayes EB. Zika virus outside Africa. *Emerg Infect Dis*. 2009 Sep;15(9):1347-50.
- 474 2. Duffy MR, Chen TH, Hancock WT, Powers AM, Kool JL, Lanciotti RS, et al.  
475 Zika virus outbreak on Yap Island, Federated States of Micronesia. *N Engl J Med*.  
476 2009 Jun 11;360(24):2536-43.
- 477 3. Brasil P, Pereira JP, Jr., Moreira ME, Ribeiro Nogueira RM, Damasceno L,  
478 Wakimoto M, et al. Zika Virus Infection in Pregnant Women in Rio de Janeiro. *N*  
479 *Engl J Med*. 2016 Dec 15;375(24):2321-34.
- 480 4. Zhang L, Wang C-C. Inflammatory response of macrophages in infection.  
481 *Hepatobiliary & Pancreatic Diseases International*. 2014;13(2):138-52.
- 482 5. Autissier P, Soulas C, Burdo TH, Williams KC. Evaluation of a 12-color flow  
483 cytometry panel to study lymphocyte, monocyte, and dendritic cell subsets in humans.  
484 *Cytometry A*. 2010 May;77(5):410-9.
- 485 6. Nikitina E, Larionova I, Choinzonov E, Kzhyshkowska J. Monocytes and  
486 Macrophages as Viral Targets and Reservoirs. *International Journal of Molecular*  
487 *Sciences*. 2018;19(9).
- 488 7. Arango Duque G, Descoteaux A. Macrophage Cytokines: Involvement in  
489 Immunity and Infectious Diseases. *Frontiers in Immunology*. 2014;5.
- 490 8. Campbell JH, Hearps AC, Martin GE, Williams KC, Crowe SM. The importance  
491 of monocytes and macrophages in HIV pathogenesis, treatment, and cure. *Aids*.  
492 2014;28(15):2175-87.
- 493 9. de Carvalho GC, Borget MY, Bernier S, Garneau D, da Silva Duarte AJ, Dumais  
494 N. RAGE and CCR7 mediate the transmigration of Zika-infected monocytes through  
495 the blood-brain barrier. *Immunobiology*. 2019 Nov;224(6):792-803.
- 496 10. Messias CV, Lemos JP, Cunha DP, Vasconcelos Z, Raphael LMS, Bonaldo MC,  
497 et al. Zika virus infects human blood mononuclear cells. *BMC Infect Dis*. 2019 Nov  
498 21;19(1):986.
- 499 11. Foo SS, Chen W, Chan Y, Bowman JW, Chang LC, Choi Y, et al. Asian Zika  
500 virus strains target CD14(+) blood monocytes and induce M2-skewed  
501 immunosuppression during pregnancy. *Nat Microbiol*. 2017 Nov;2(11):1558-70.
- 502 12. Ayala-Nunez NV, Follain G, Delalande F, Hirschler A, Partiot E, Hale GL, et al.  
503 Zika virus enhances monocyte adhesion and transmigration favoring viral  
504 dissemination to neural cells. *Nat Commun*. 2019 Sep 27;10(1):4430.
- 505 13. Zheng Y, Liu Q, Wu Y, Ma L, Zhang Z, Liu T, et al. Zika virus elicits  
506 inflammation to evade antiviral response by cleaving cGAS via NS1-caspase-1 axis.  
507 *Embo J*. 2018 Sep 14;37(18).
- 508 14. Khaiboullina SF, Uppal T, Sarkar R, Gorzalski A, St Jeor S, Verma SC. ZIKV  
509 infection regulates inflammasomes pathway for replication in monocytes. *Sci Rep*.  
510 2017 Nov 22;7(1):16050.
- 511 15. Wang W, Li G, De W, Luo Z, Pan P, Tian M, et al. Zika virus infection induces  
512 host inflammatory responses by facilitating NLRP3 inflammasome assembly and  
513 interleukin-1beta secretion. *Nat Commun*. 2018 Jan 9;9(1):106.

- 514 16. Jurado KA, Iwasaki A. Zika virus targets blood monocytes. *Nat Microbiol.* 2017  
515 Nov;2(11):1460-1.
- 516 17. Quicke KM, Bowen JR, Johnson EL, McDonald CE, Ma H, O'Neal JT, et al. Zika  
517 Virus Infects Human Placental Macrophages. *Cell Host Microbe.* 2016 Jul  
518 13;20(1):83-90.
- 519 18. Orzalli MH, Kagan JC. Apoptosis and Necroptosis as Host Defense Strategies to  
520 Prevent Viral Infection. *Trends Cell Biol.* 2017 Nov;27(11):800-9.
- 521 19. Brubaker SW, Gauthier AE, Mills EW, Ingolia NT, Kagan JC. A bicistronic  
522 MAVS transcript highlights a class of truncated variants in antiviral immunity. *Cell.*  
523 2014 Feb 13;156(4):800-11.
- 524 20. Qian XY, Nguyen HN, Song MM, Hadiono C, Ogden SC, Hammack C, et al.  
525 Brain-Region-Specific Organoids Using Mini-bioreactors for Modeling ZIKV  
526 Exposure. *Cell.* 2016 May 19;165(5):1238-54.
- 527 21. Hamel R, Dejarnac O, Wichit S, Ekchariyawat P, Neyret A, Luplertlop N, et al.  
528 Biology of Zika Virus Infection in Human Skin Cells. *J Virol.* 2015 Sep;89(17):8880-  
529 96.
- 530 22. Kopitar-Jerala N. The Role of Interferons in Inflammation and Inflammasome  
531 Activation. *Front Immunol.* 2017;8:873.
- 532 23. Green DR. The Coming Decade of Cell Death Research: Five Riddles. *Cell.* 2019  
533 May 16;177(5):1094-107.
- 534 24. Miner JJ, Cao B, Govero J, Smith AM, Fernandez E, Cabrera OH, et al. Zika  
535 Virus Infection during Pregnancy in Mice Causes Placental Damage and Fetal  
536 Demise. *Cell.* 2016 May 19;165(5):1081-91.
- 537 25. Fesq H, Bacher M, Nain M, Gemsa D. Programmed cell death (apoptosis) in  
538 human monocytes infected by influenza A virus. *Immunobiology.* 1994 Feb;190(1-  
539 2):175-82.
- 540 26. Ito M, Yamamoto T, Watanabe M, Ihara T, Kamiya H, Sakurai M. Detection of  
541 measles virus-induced apoptosis of human monocytic cell line (THP-1) by DNA  
542 fragmentation ELISA. *FEMS Immunol Med Microbiol.* 1996 Sep;15(2-3):115-22.
- 543 27. Hanon E, Lambot M, Hoornaert S, Lyaku J, Pastoret PP. Bovine herpesvirus 1-  
544 induced apoptosis: phenotypic characterization of susceptible peripheral blood  
545 mononuclear cells. *Arch Virol.* 1998;143(3):441-52.
- 546 28. Lambot M, Hanon E, Lecomte C, Hamers C, Letesson JJ, Pastoret PP. Bovine  
547 viral diarrhoea virus induces apoptosis in blood mononuclear cells by a mechanism  
548 largely dependent on monocytes. *J Gen Virol.* 1998 Jul;79 ( Pt 7):1745-9.
- 549 29. Espina LM, Valero NJ, Hernandez JM, Mosquera JA. Increased apoptosis and  
550 expression of tumor necrosis factor-alpha caused by infection of cultured human  
551 monocytes with dengue virus. *Am J Trop Med Hyg.* 2003 Jan;68(1):48-53.
- 552 30. Alidjinou EK, Sane F, Trauet J, Copin MC, Hober D. Coxsackievirus B4 Can  
553 Infect Human Peripheral Blood-Derived Macrophages. *Viruses.* 2015 Nov  
554 24;7(11):6067-79.
- 555 31. Hober D, Chehadeh W, Bouzidi A, Wattré P. Antibody-dependent enhancement  
556 of coxsackievirus B4 infectivity of human peripheral blood mononuclear cells results  
557 in increased interferon-alpha synthesis. *J Infect Dis.* 2001 Nov 1;184(9):1098-108.

- 558 32. Freistadt MS, Eberle KE. Correlation between poliovirus type 1 Mahoney  
559 replication in blood cells and neurovirulence. *J Virol.* 1996 Sep;70(9):6486-92.
- 560 33. Michlmayr D, Kim E-Y, Rahman AH, Raghunathan R, Kim-Schulze S, Che Y, et  
561 al. Comprehensive Immunoprofiling of Pediatric Zika Reveals Key Role for  
562 Monocytes in the Acute Phase and No Effect of Prior Dengue Virus Infection. *Cell*  
563 *Reports.* 2020;31(4).
- 564 34. Klomporn P, Panyasrivanit M, Wikan N, Smith DR. Dengue infection of  
565 monocytic cells activates ER stress pathways, but apoptosis is induced through both  
566 extrinsic and intrinsic pathways. *Virology.* 2011 Jan 20;409(2):189-97.
- 567 35. Tan TY, Chu JJH. Dengue virus-infected human monocytes trigger late activation  
568 of caspase-1, which mediates pro-inflammatory IL-1beta secretion and pyroptosis. *J*  
569 *Gen Virol.* 2013 Oct;94(Pt 10):2215-20.
- 570 36. Luo H, Winkelmann ER, Fernandez-Salas I, Li L, Mayer SV, Danis-Lozano R, et  
571 al. Zika, dengue and yellow fever viruses induce differential anti-viral immune  
572 responses in human monocytic and first trimester trophoblast cells. *Antiviral Res.*  
573 2018 Mar;151:55-62.
- 574 37. Wang Y, Gao W, Shi X, Ding J, Liu W, He H, et al. Chemotherapy drugs induce  
575 pyroptosis through caspase-3 cleavage of a gasdermin. *Nature.* 2017 Jul  
576 6;547(7661):99-103.
- 577  
578  
579  
580  
581  
582  
583  
584  
585  
586  
587  
588  
589  
590  
591  
592  
593  
594  
595  
596  
597  
598  
599  
600  
601



## 602 **FIGURE LEGENDS**

603

604 **Figure 1.** Viral replication and cell death caused in ZIKV-infected monocytic cells.

605 Human and mouse monocytic THP-1 (**A**) and RAW264.7 (**B**) cells were infected with  
606 ZIKV at 1 MOI and shown cytopathic effect (CPE) at 24 and 48 hrs p.i. (Magnification x  
607 40). Cell viability was assessed at various time points p.i. in THP-1 (**C**) and RAW264.7  
608 (**D**) cells infected with ZIKV at various MOIs by an MTT assay. Total RNA was  
609 prepared for realtime RT-PCR to quantify copy numbers of ZIKV E RNA in infected  
610 THP-1 (**E**) and RAW264.7 (**F**) ZIKV E protein expression was detected in cell lysates  
611 prepared from infected THP-1 (**G**) and RAW264.7 (**H**) cells by western blot analyses.  
612 The data were presented as mean  $\pm$ SD and analysed by Student's t-test. \*,  $P < 0.05$ ; \*\*,  
613  $P < 0.01$ ; \*\*\*,  $P < 0.001$ .

614

615 **Figure 2.** Morphological changes of cell death induced in ZIKV-infected monocytes pre-  
616 treated by programmed death inhibitors. THP-1 (**A**) and RAW264.7 (**B**) cells were pre-  
617 treated with pan-caspases inhibitor, ZVAD-FMK, or RIPK inhibitors, Nec-1s and  
618 GSK'872, followed by infection with ZIKV at 1 MOI. The cells were observed at 24 and  
619 48 hrs p.i. under a light microscope (Magnification x 40).

620

621 **Figure 3.** Blockage of cell death induced in ZIKV-infected cells by the inhibitors of  
622 programmed cell death. THP-1 (**A**) and RAW264.7 (**B**) cells were pre-treated with pan-  
623 caspases inhibitor, ZVAD-FMK, or RIPK inhibitors, Nec-1s and GSK'872, followed by

624 infection with ZIKV at 1 MOI. The cell viability was assessed at 24 and 48 hrs p.i. with  
625 an MTT assay. The data were shown as mean  $\pm$ SD and analysed by unpaired Students t-  
626 test. \*, P<0.05; \*\*, P<0.01; \*\*\*, P<0.001; ns, no significance.

627

628 **Figure 4.** Inflammasome activation led to pyroptosis in ZIKV-infected monocytes. Cell  
629 lysates, prepared at various time points p.i. from THP-1 (A) and RAW264.7 (B) cells  
630 infected with 1 MOI ZIKV, were analysed by western blot analyses with antibodies for  
631 pro- or cleaved caspase-1 and GSDMD. Quantitative analyses of the grayscale values in  
632 the blots of the pro- and cleaved caspase-1 and GSDMD in infected and control THP-1  
633 (C, D, & F) and RAW264.7 (E, G, & H) cells were shown. The experiments were  
634 performed in triplicates and the data were shown as mean+SD, analysed by unpaired  
635 Students t-test. \*, P<0.05; \*\*, P<0.01; \*\*\*, P<0.001.

636

637 **Figure 5.** Upregulation of the inflammasome components in ZIKV-infected monocytes.  
638 Total RNA was prepared at various time points p.i. from THP-1 (A-C) and RAW264.7  
639 (D-F) cells infected with 1 MOI of ZIKV for realtime RT-PCR to measure mRNA  
640 transcript numbers of pro-caspase-1 (A & D), NLRP3 (B & E), ASC (C & F). The  
641 experiments were performed in triplicates and the data were shown as mean+SD,  
642 analysed by unpaired Students t-test. \*, P<0.05; \*\*, P<0.01; \*\*\*, P<0.001. ns, no  
643 significance.

644

645 **Figure 6.** Transcriptional upregulation and secretion of IL-1 $\beta$  and IL-18 in ZIKV-

646 infected human and murine monocytes. Total RNA was prepared at various time points  
647 p.i. from THP-1 (**A-B**) and RAW264.7 (**C-D**) cells infected with 1 MOI of ZIKV for  
648 realtime RT-PCR to measure mRNA transcript numbers of pro-IL-1 $\beta$  (**A & C**) and IL-18  
649 (**B-D**) genes. Culture medium was sampled at various time points p.i. from ZIKV-  
650 infected THP-1 (**E-F**) and RAW264.7 (**G-H**) cells for measurement of secreted IL-1 $\beta$  (**E**  
651 **& G**) and IL-18 (**F & H**) by ELISA. The experiments were performed in triplicates and  
652 the data were shown as mean+SD and analysed by unpaired Students t-test. \*, P<0.05;  
653 \*\*, P<0.01; \*\*\*, P<0.001. ns, no significance.

654

655 **Figure 7.** Pyroptosis was dependent on caspase-1 in ZIKV-infected human and murine  
656 monocytes. Cell lysates were prepared at various time points p.i. from ZIKV-infected  
657 THP-1 (**A**) and RAW264.7 (**B**) cells which were untreated or pre-treated with VX765, a  
658 caspase-1 inhibitor, at 20 $\mu$ M. The lysates were analysed by western blot analyses with an  
659 anti-cleaved caspase-1 antibody. Morphological changes were observed on ZIKV-  
660 infected THP-1 (**C**) and RAW264.7 (**D**) cells, which were untreated or pre-treated with  
661 VX765, under a light microscope (Magnification x40). Culture medium was sampled at  
662 various time points p.i. from ZIKV-infected THP-1 (**E**) and RAW264.7 (**F**) cells, which  
663 were untreated or pre-treated with VX765, for measurement of secreted IL-1 $\beta$  by ELISA.  
664 The experiments were performed in triplicates and the data were shown as mean+SD and  
665 analysed by unpaired Students t-test. \*, P<0.05; \*\*, P<0.01; \*\*\*, P<0.001.

666

667 **Figure 8.** Pyroptosis was suppressed in ZIKV-infected monocytes with pro-caspase-1

668 knockdown. **(A)** Knockdown of pro-caspase-1 in THP-1 cells. Cell lysates were prepared  
669 from lentiviral vector-transduced THP-1 cell lines, expressing shRNA1, 2, or 3 targeting  
670 mRNA of pro-caspase-1, for western blot analyses with pro-caspase-1 antibody to  
671 examine the knockout (KD) efficacy. **(B)** Inhibition of pro-caspase-1 and GSDMD  
672 processing in pro-caspase-1 KD cells. Both pro-caspase-1 or scramble shRNA KD cells  
673 were infected with ZIKV and cell lysates, prepared at various time points p.i., were  
674 subjected to western blot analyses with antibodies for pro-caspase-1, cleaved caspase-1  
675 and GSDMD. **(C)** Cell viability was assessed in pro-caspase-1 or scramble shRNA KD  
676 THP-1 cells infected with or without ZIKV at various MOIs by an MTT assay. **(D)**  
677 Culture medium was sampled at various time points p.i. from pro-caspase-1 or scramble  
678 shRNA KD cells infected with or without ZIKV for measurement of secreted IL-1 $\beta$  by  
679 ELISA. The experiments were performed in triplicates and the data were shown as  
680 mean+SD and analysed by unpaired Students t-test. \*P, <0.05; \*\*, P<0.01. ns, no  
681 significance.

682

683 **Figure 9.** Pyroptosis triggered in ZIKV-infected monocytes were dependent on the  
684 NLRP3 inflammasome activation. **(A)** Knockdown of NLRP3 in THP-1 cells. Cell  
685 lysates were prepared from lentiviral vector-transduced THP-1 cell lines, expressing  
686 shRNA1, 2, or 3 targeting mRNA of NLRP3, for western blot analyses with an NLRP3  
687 antibody to examine the knockdown (KD) efficacy. **(B)** Inhibition of pro-caspase-1 and  
688 GSDMD processing in NLRP3 KD cells. Both NLRP3 or scramble shRNA KD cells  
689 were infected with ZIKV and cell lysates, prepared at various time points p.i., were

690 subjected to western blot analyses with antibodies for pro-caspase-1, cleaved caspase-1  
691 and GSDMD. (C) Cell viability was assessed in NLRP3 or scramble shRNA KD THP-1  
692 infected with or without ZIKV at various MOIs by an MTT assay. (D) Culture medium  
693 was sampled at various time points p.i. from NLRP3 or scramble shRNA KD cells,  
694 infected with or without ZIKV, for measurement of secreted IL-1 $\beta$  by ELISA. The  
695 experiments were performed in triplicates and the data were shown as mean+SD and  
696 analysed by unpaired Students t-test. \*\*, P<0.01; \*\*\*, P<0.001. ns, no significance.

697

698

#### 699 **SUPPLEMENTAL INFORMATION**

700

701 **Figure S1.** Activation of Caspases and Phosphorylation of RIPKs in ZIKV-infected  
702 Monocytes. THP-1 cells were infected with ZIKV and cell lysates were prepared at  
703 various time points p.i. for western blot analyses with antibodies for pro- and cleaved  
704 caspase-3, PARP (A) and RIPK1, RIPK3, and MLKL (B).

705

706

707

708

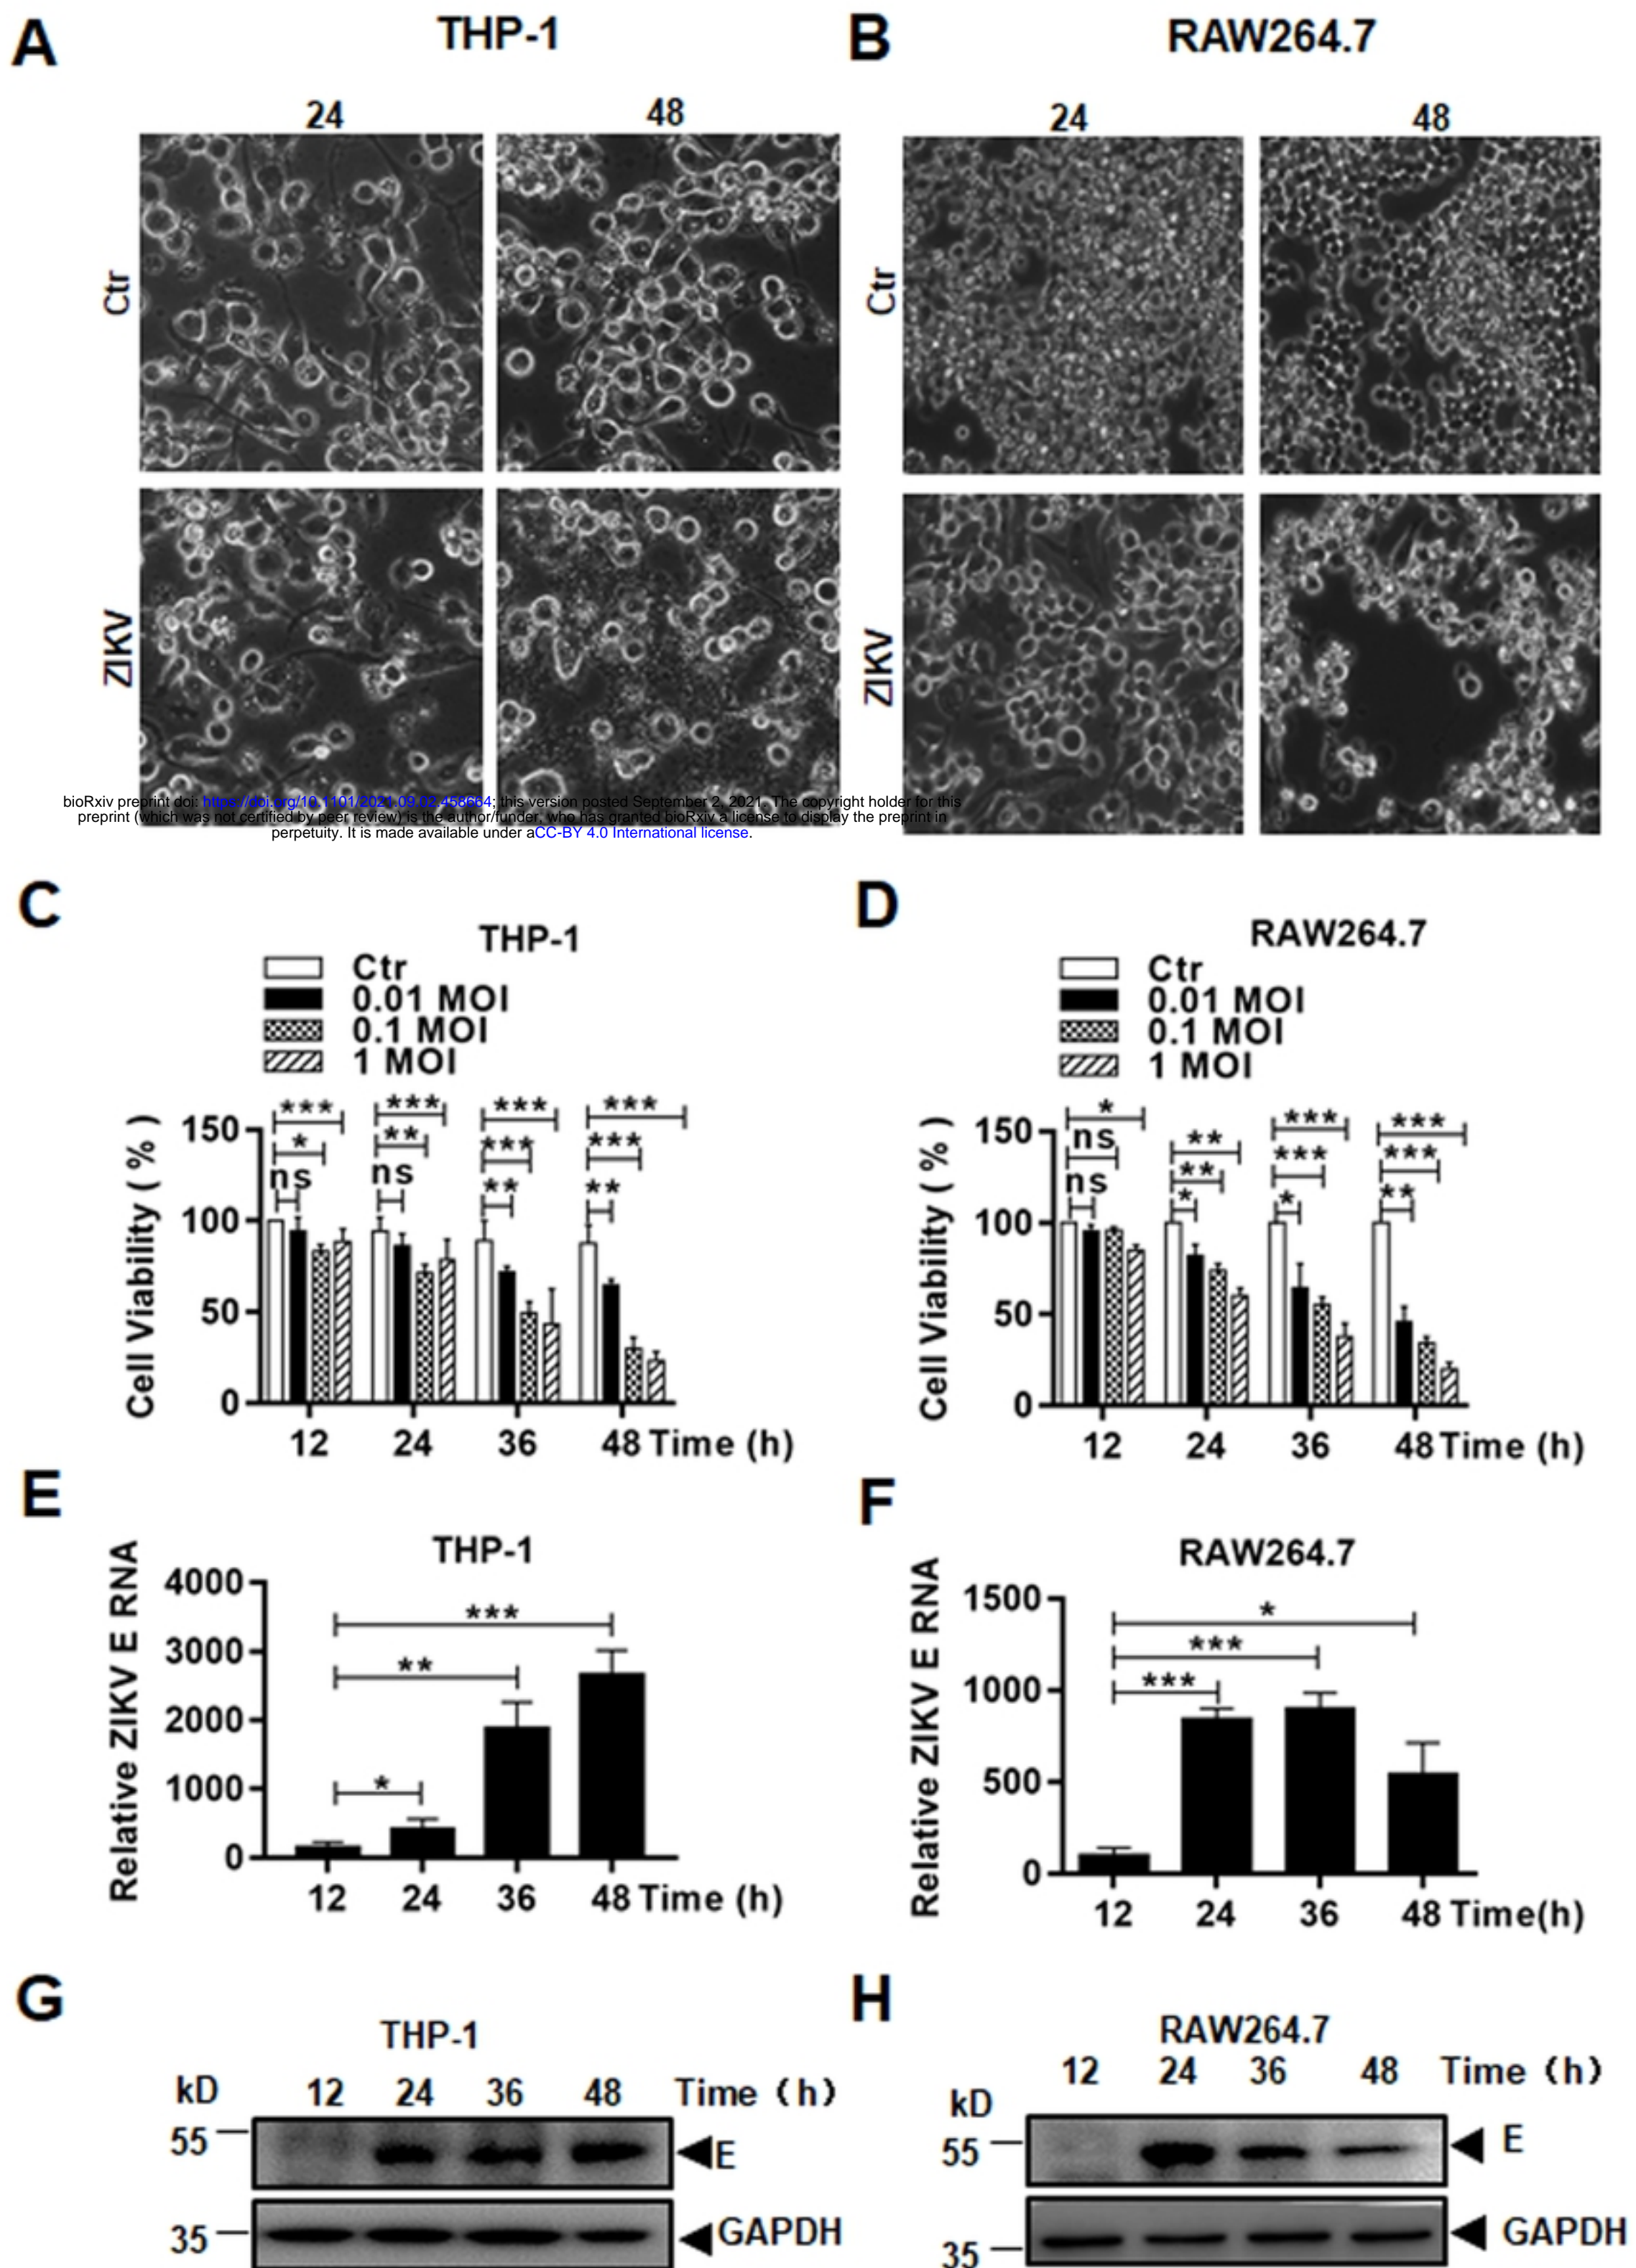

Figure 1

**A**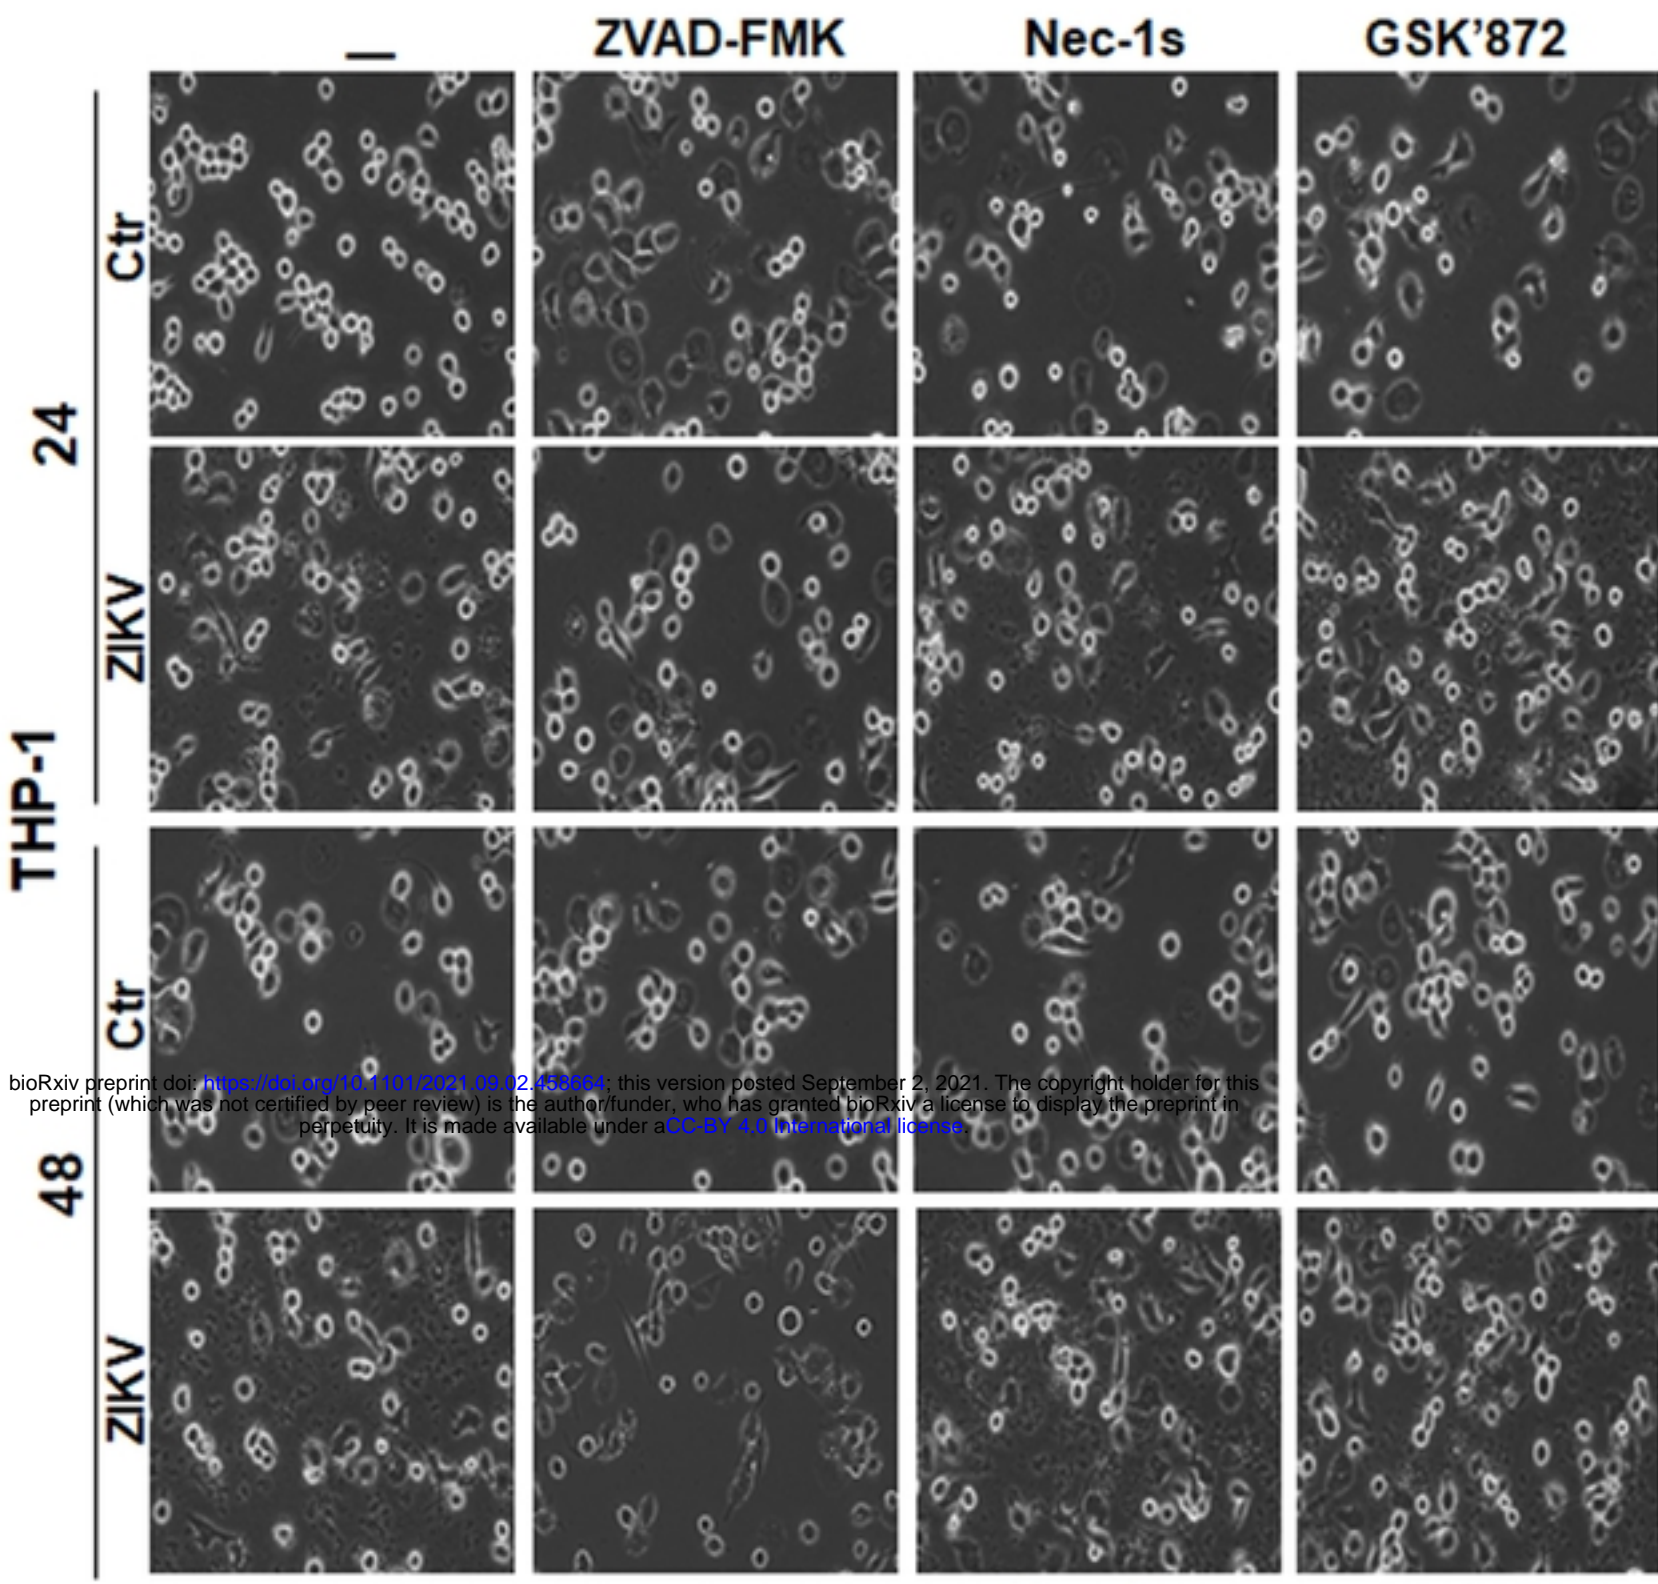

bioRxiv preprint doi: <https://doi.org/10.1101/2021.09.02.458664>; this version posted September 2, 2021. The copyright holder for this preprint (which was not certified by peer review) is the author/funder, who has granted bioRxiv a license to display the preprint in perpetuity. It is made available under a [CC-BY 4.0 International license](https://creativecommons.org/licenses/by/4.0/).

**B**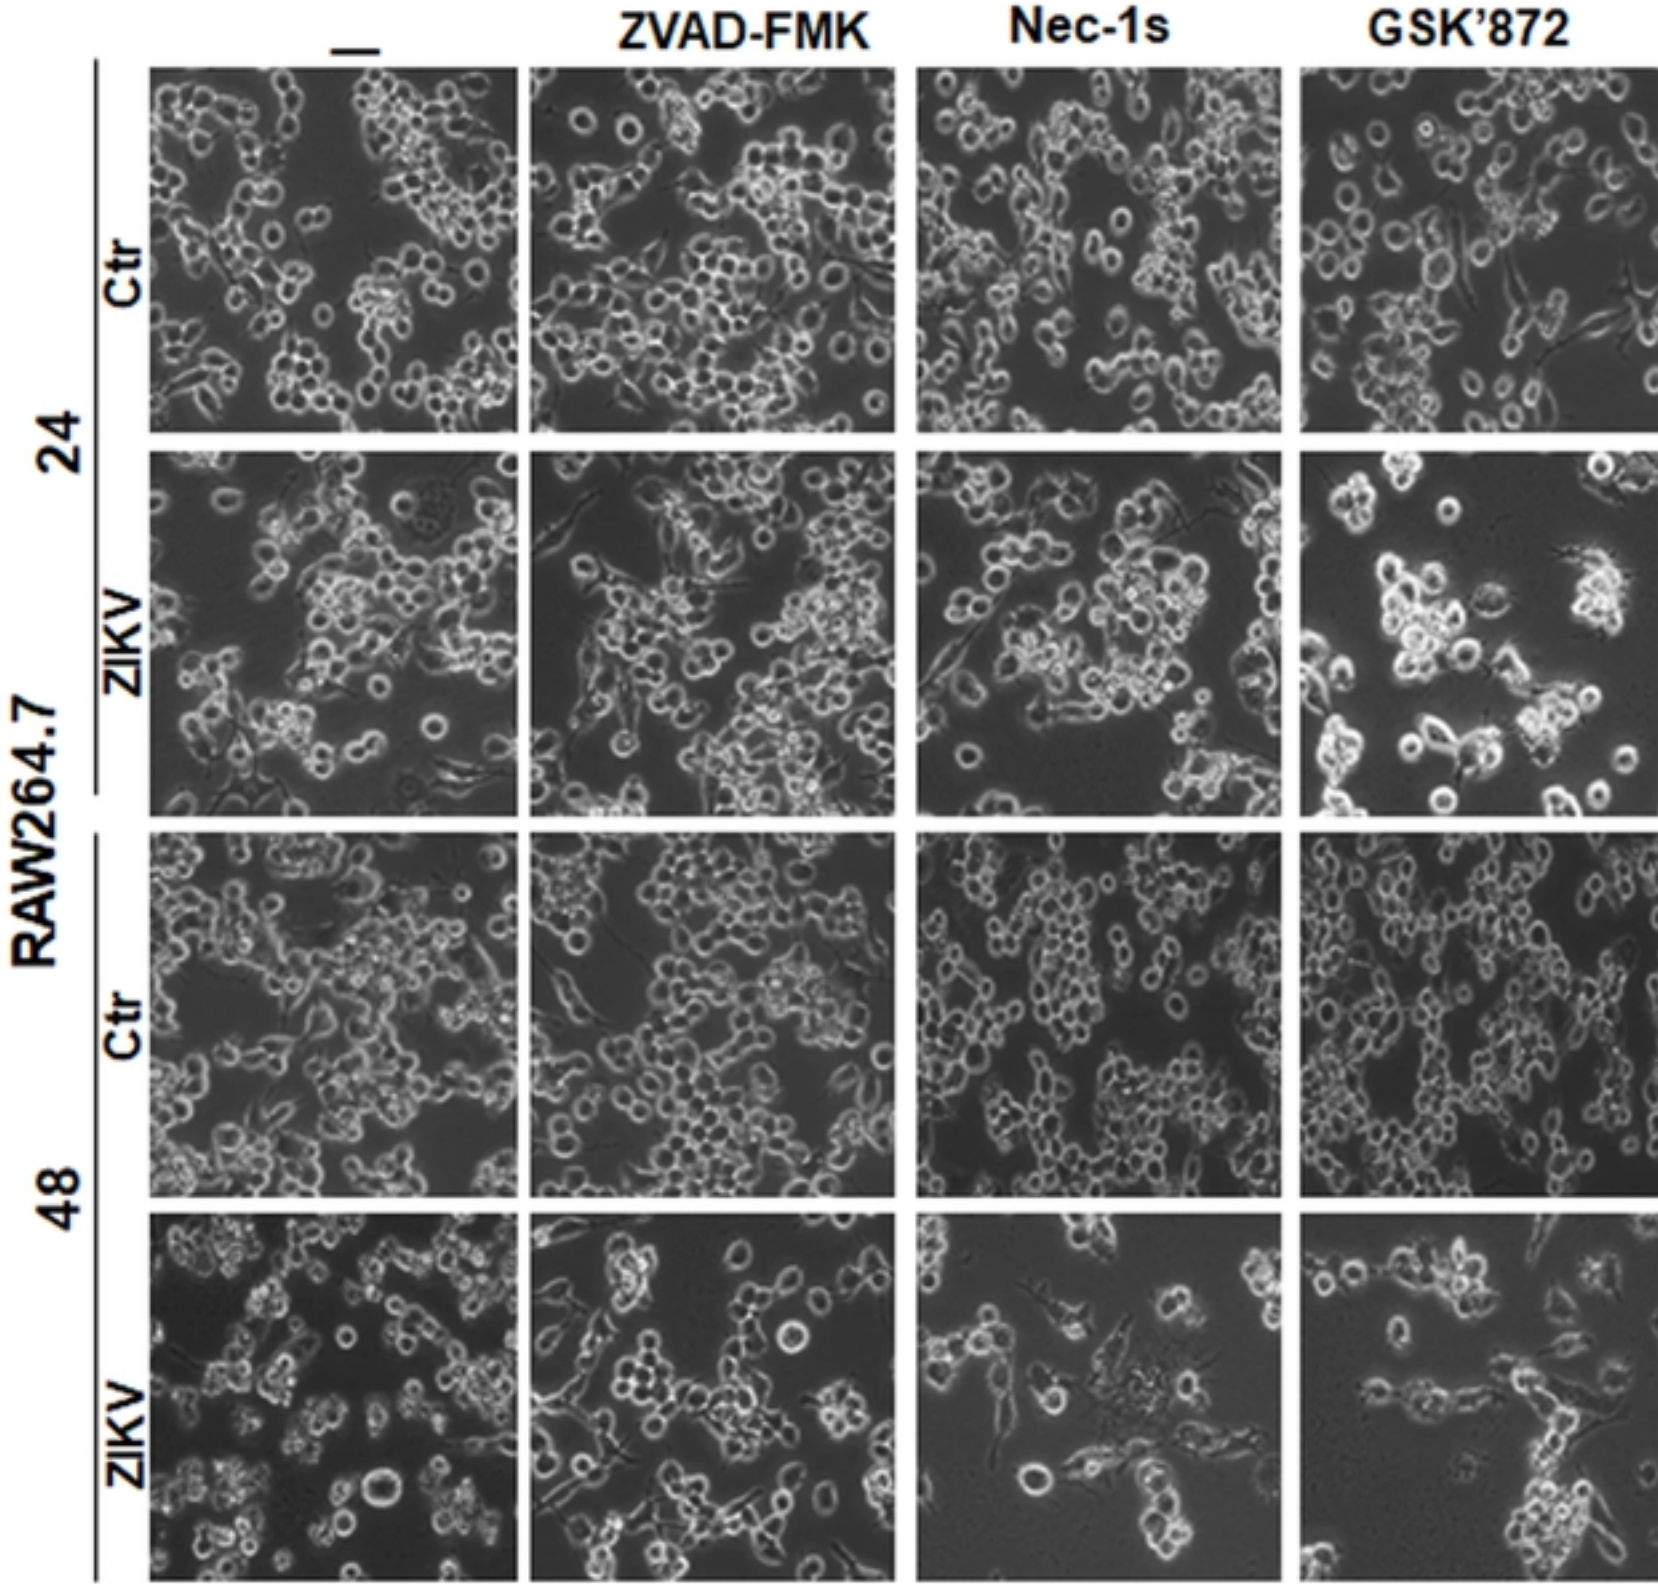

Figure 2

**A**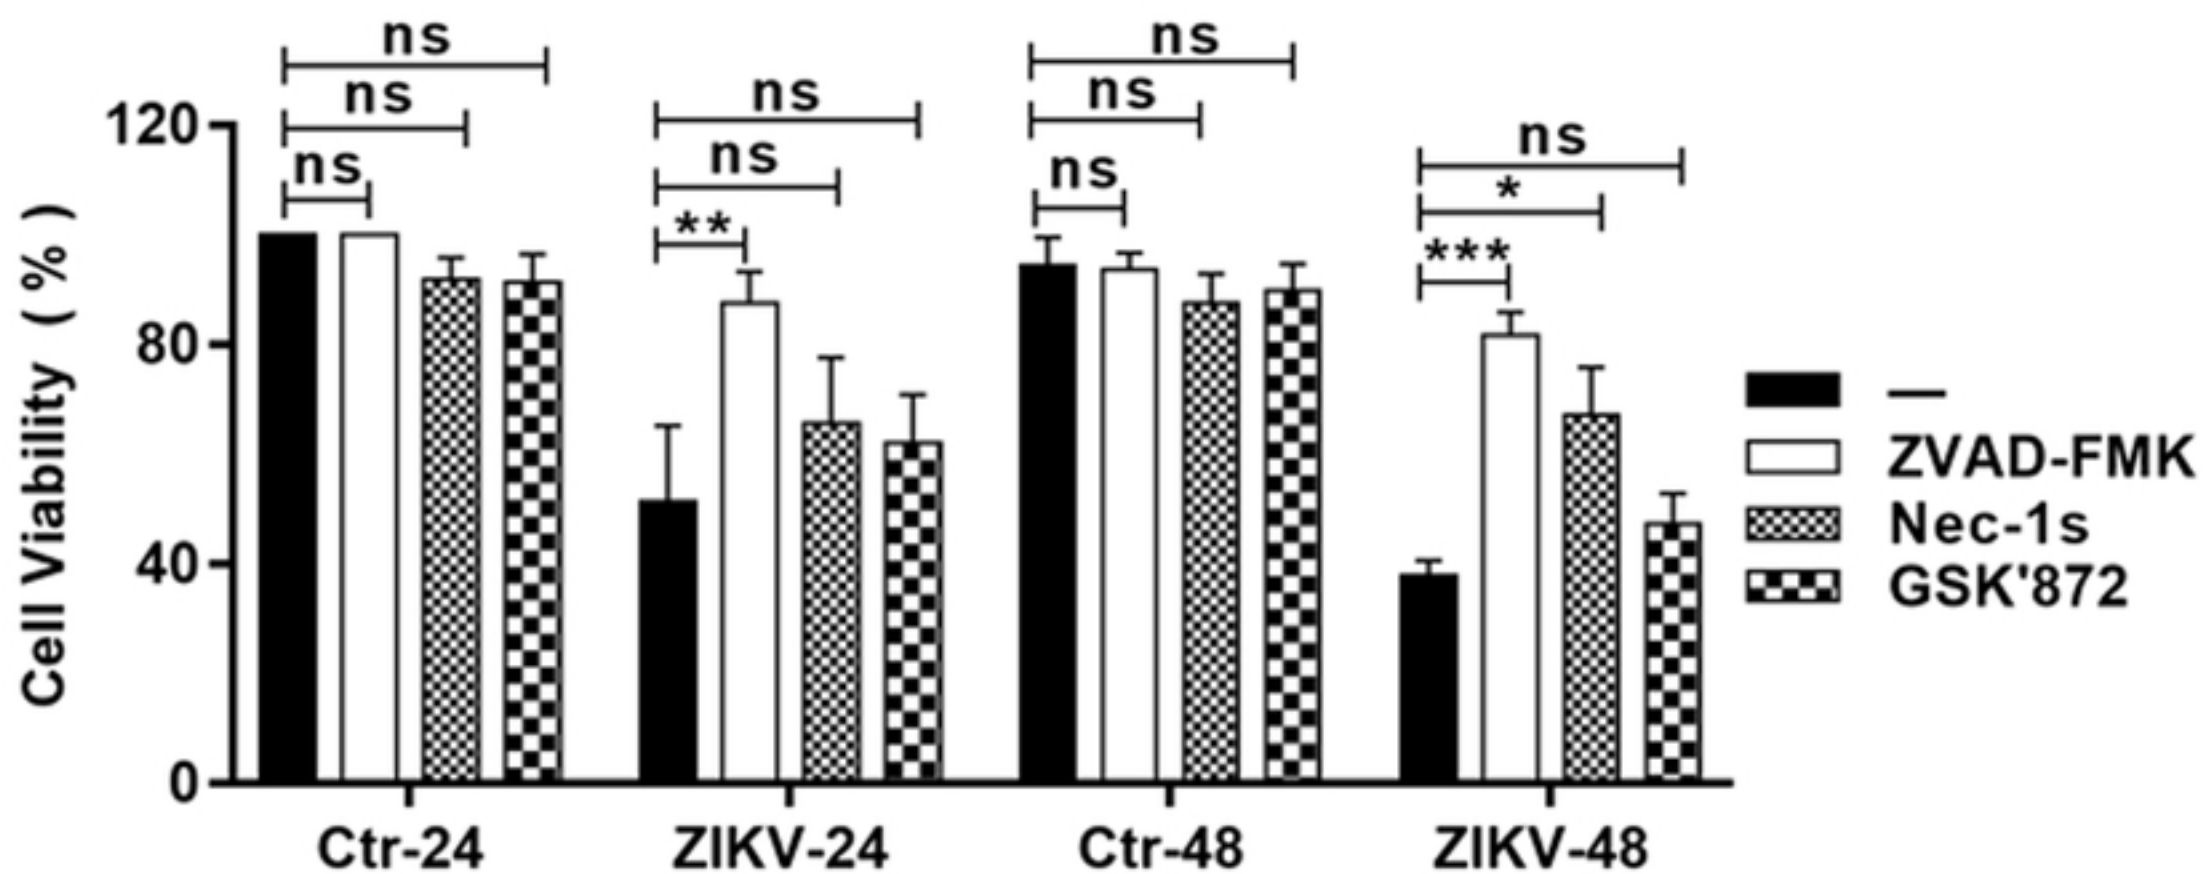**B**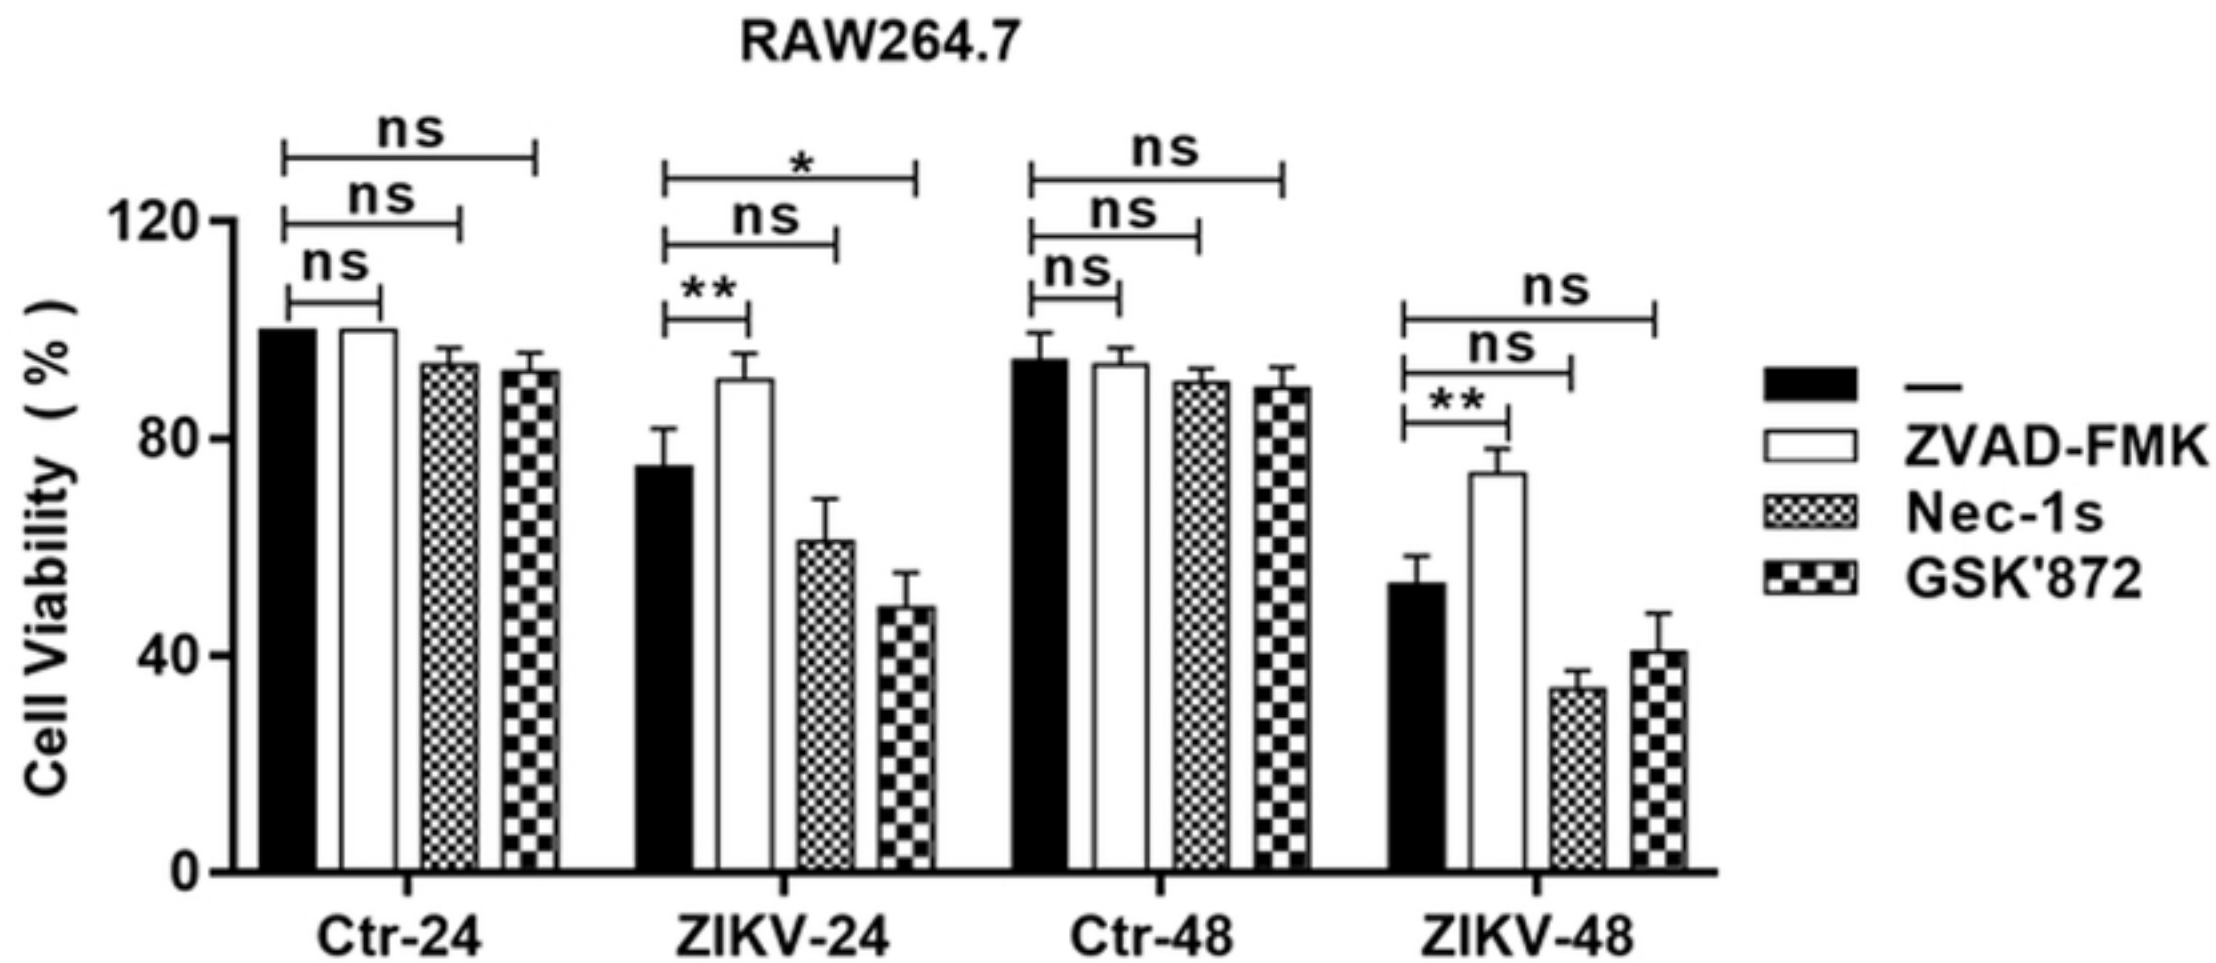

Figure 3



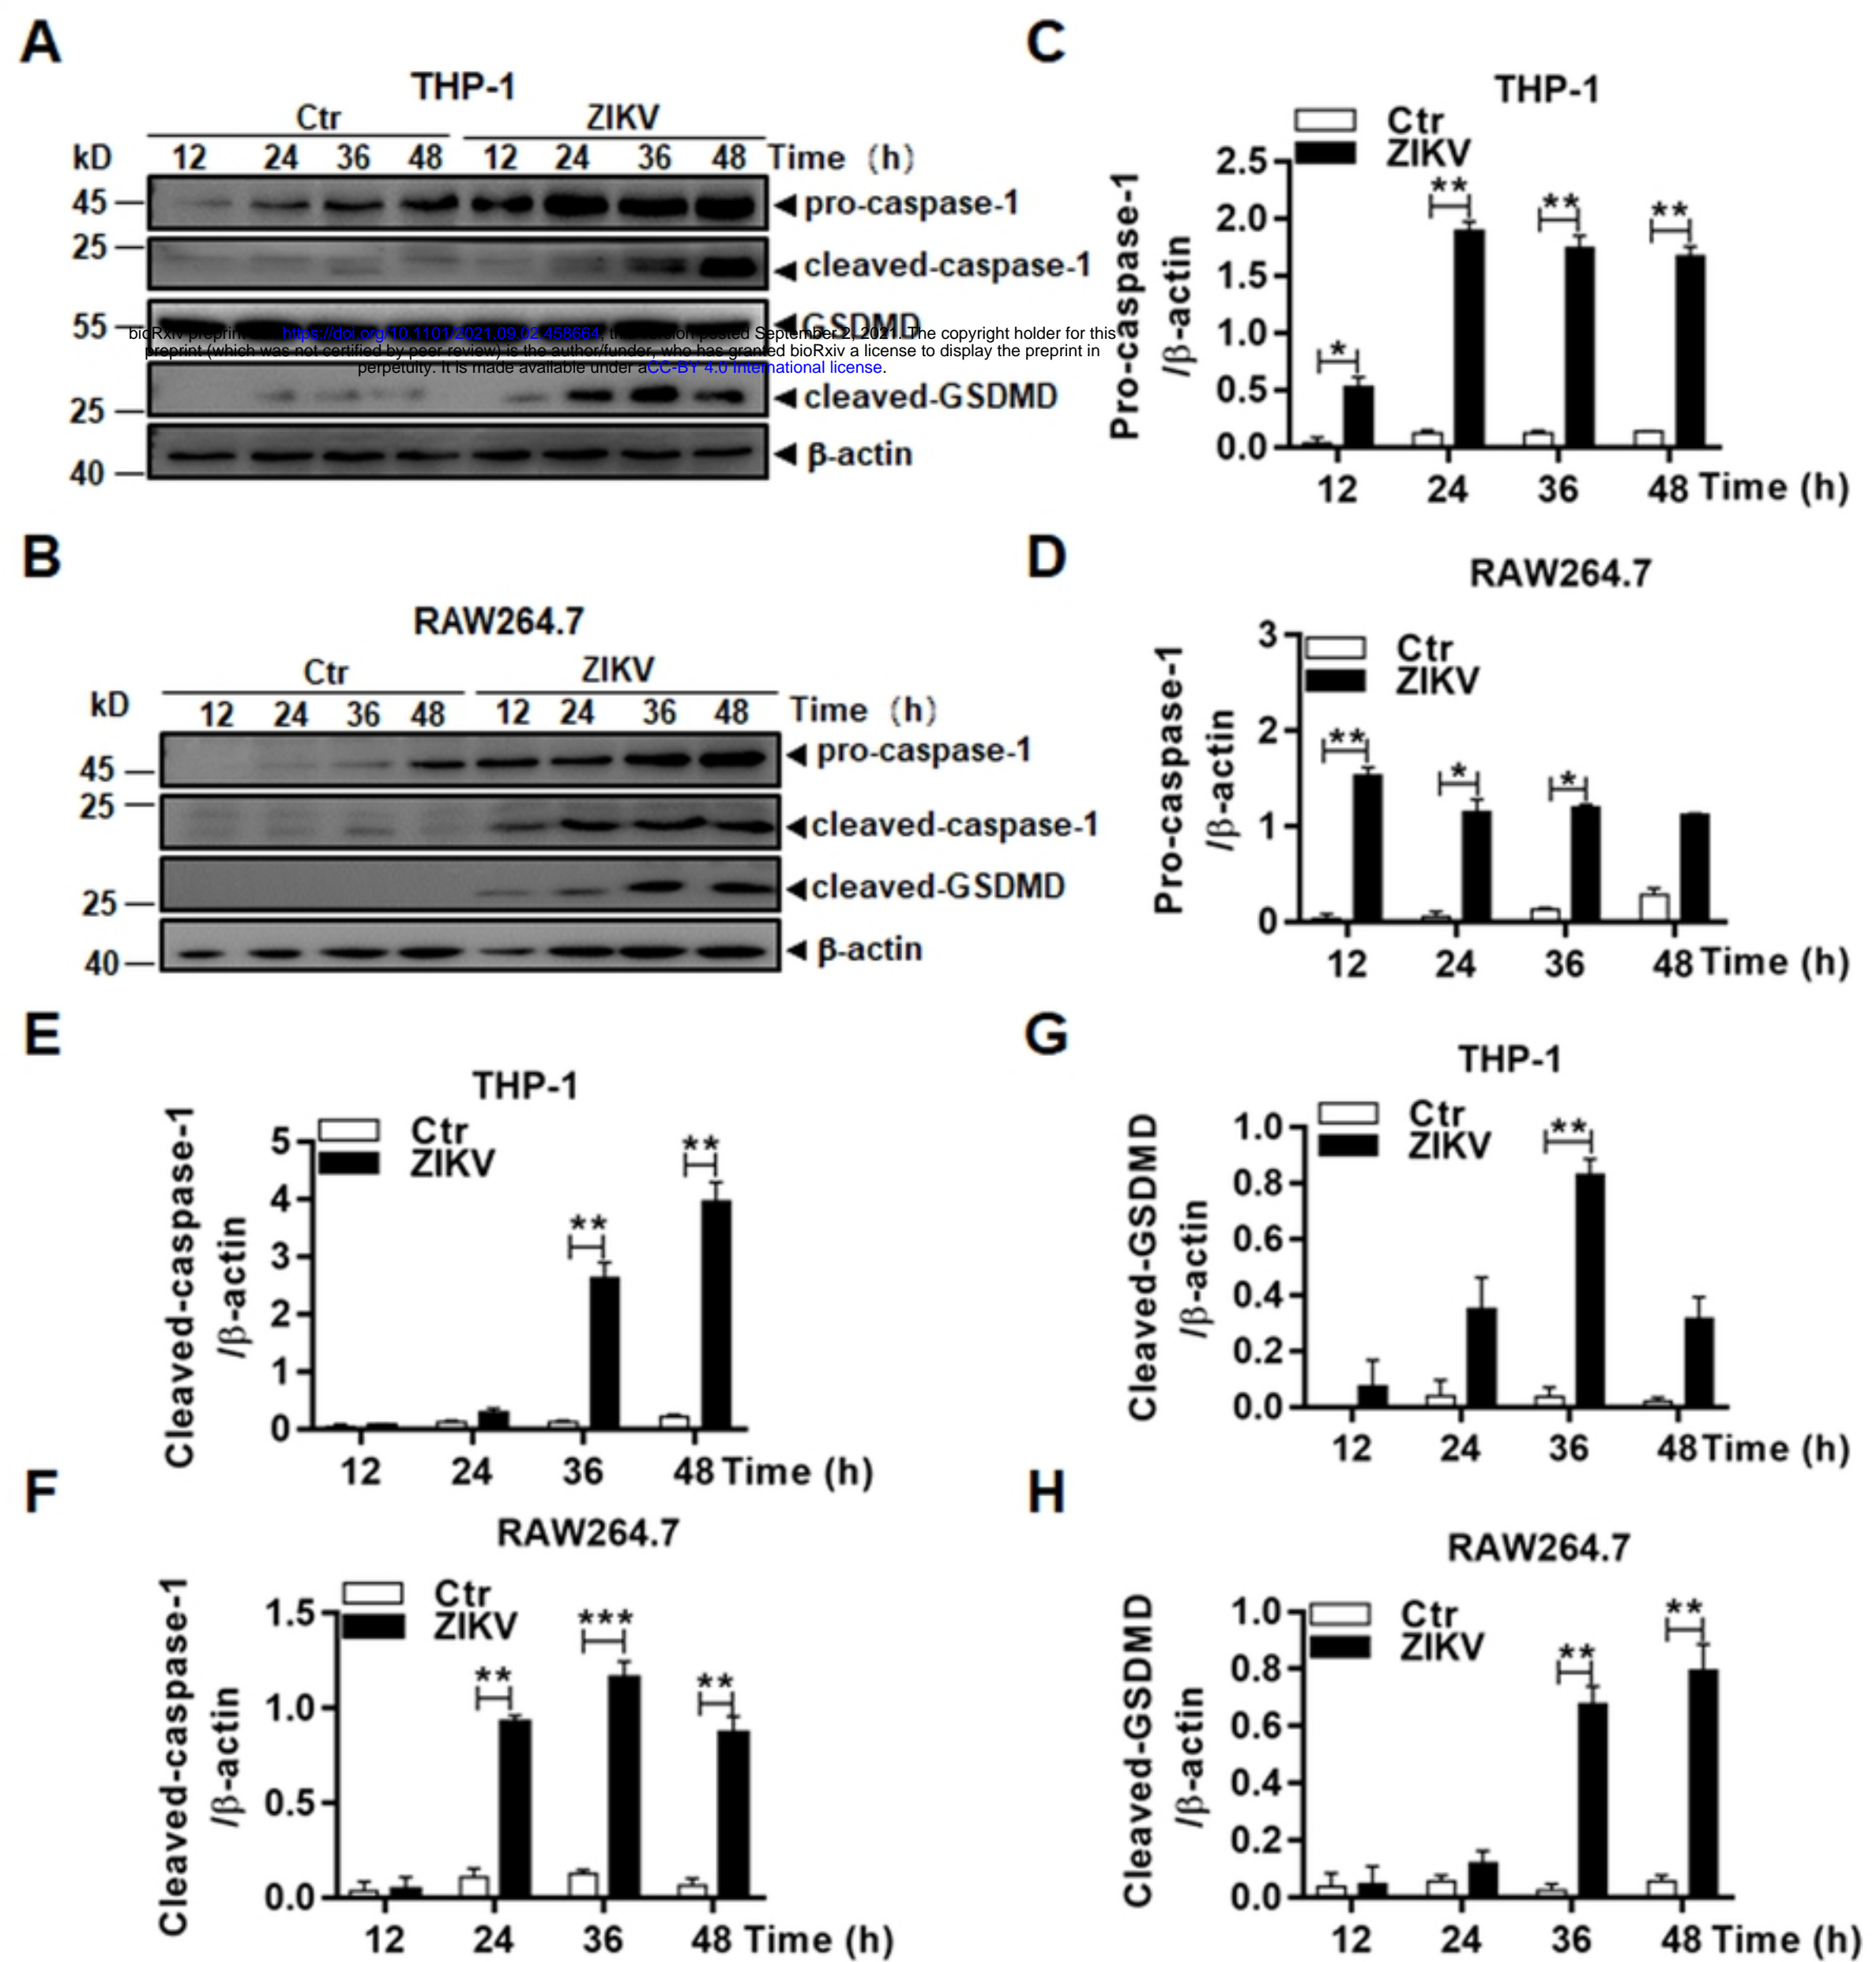

Figure 4

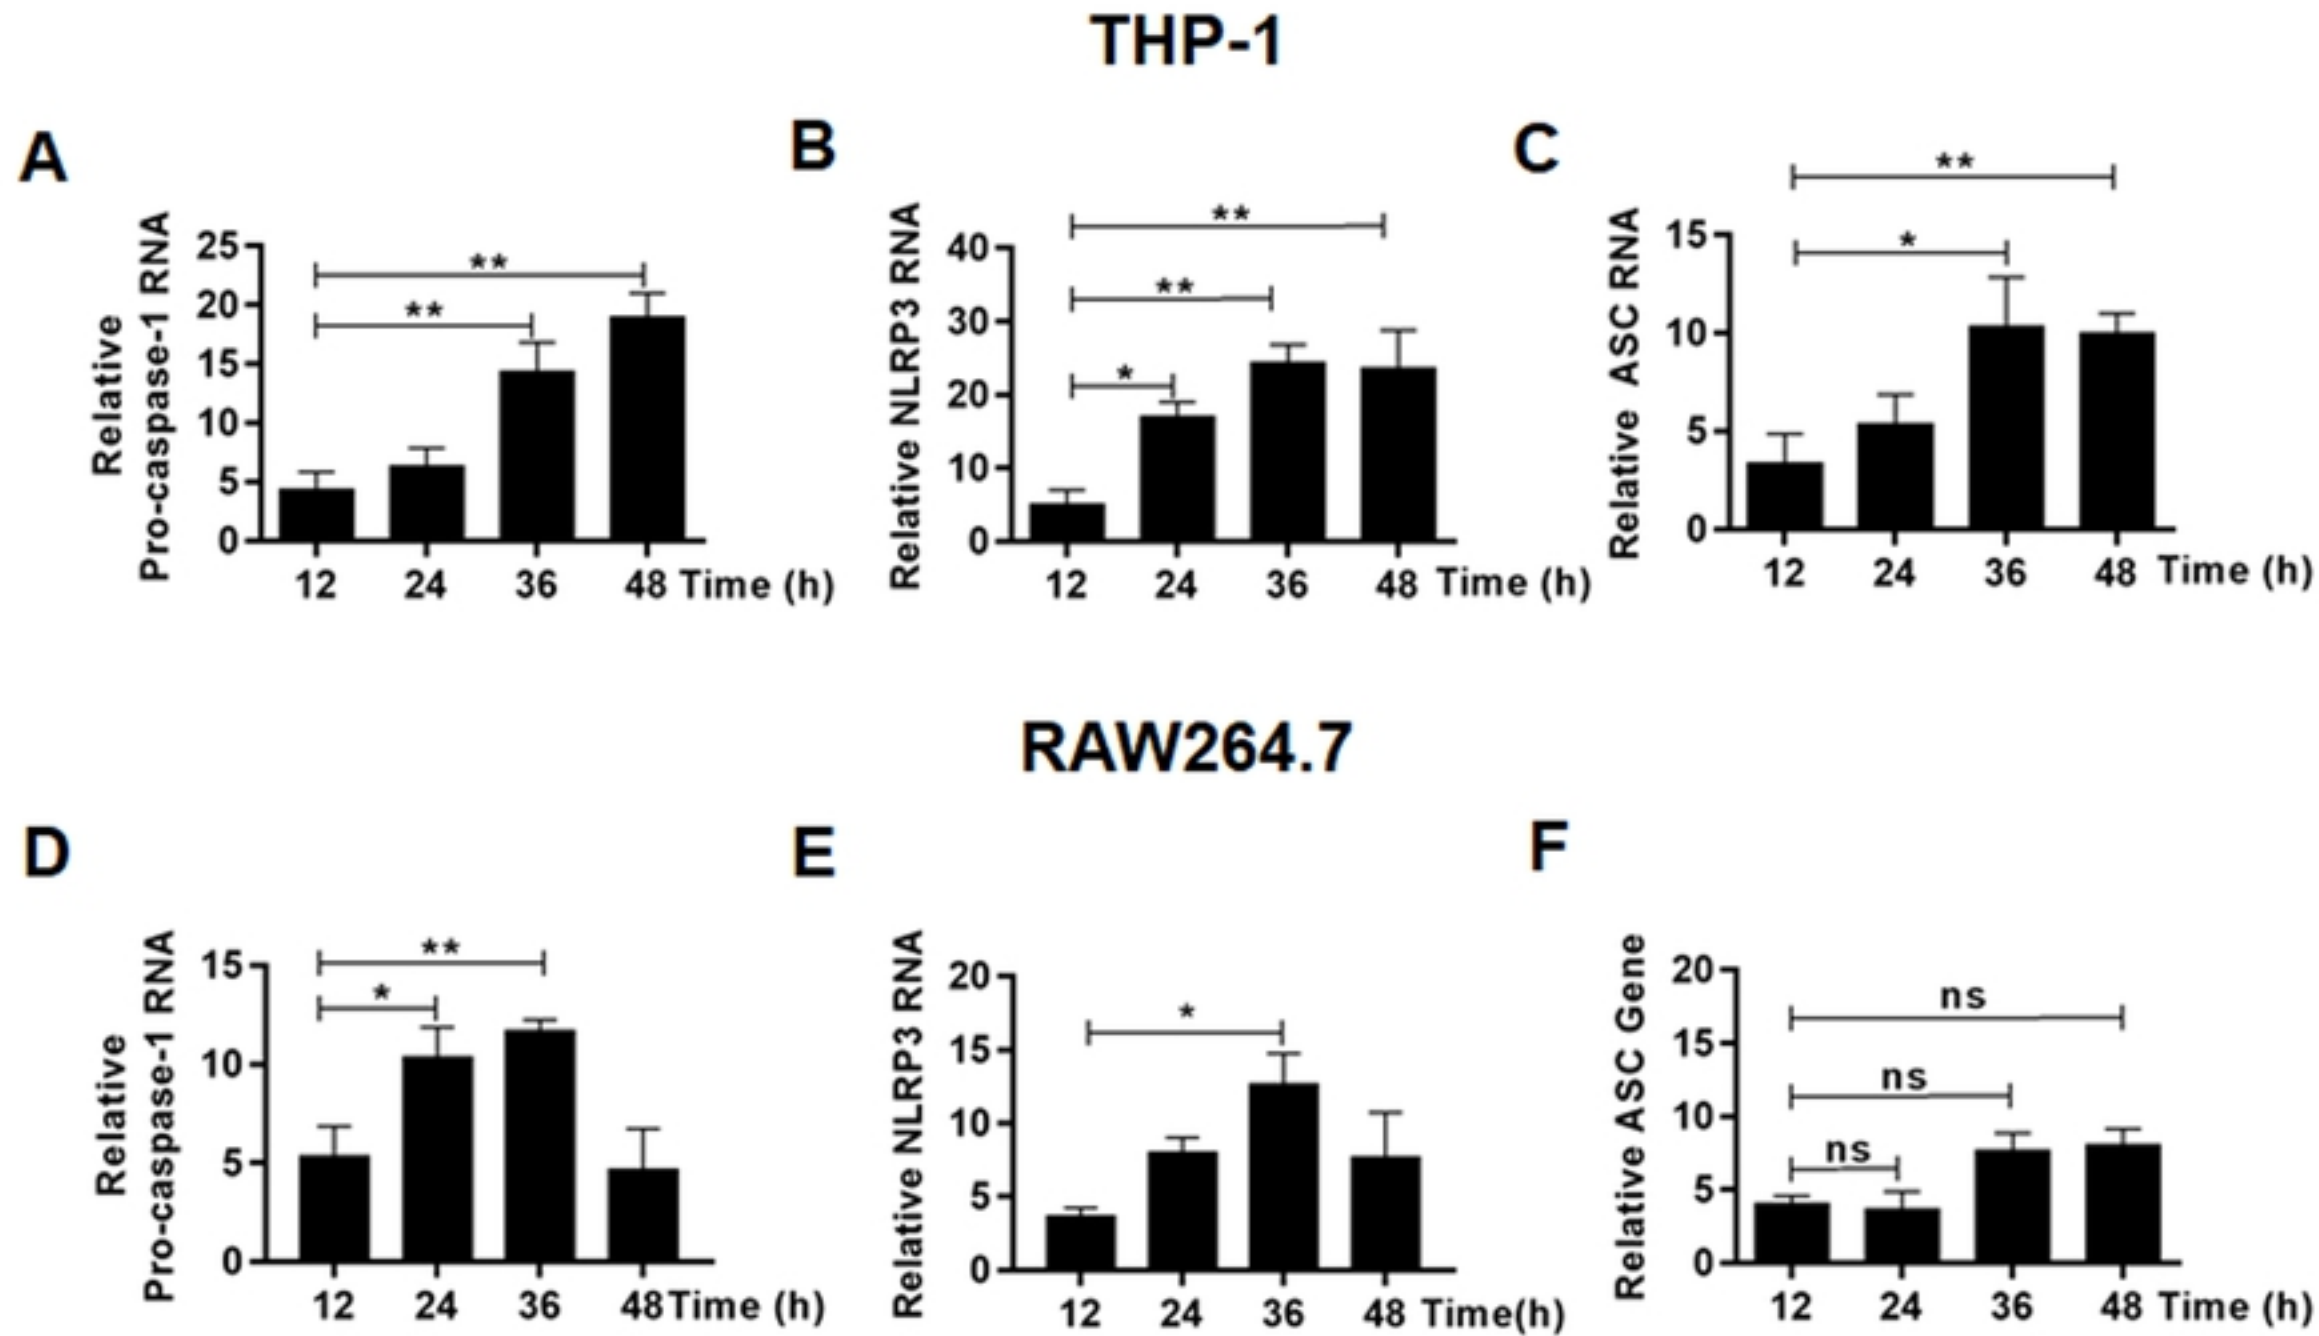

Figure 5

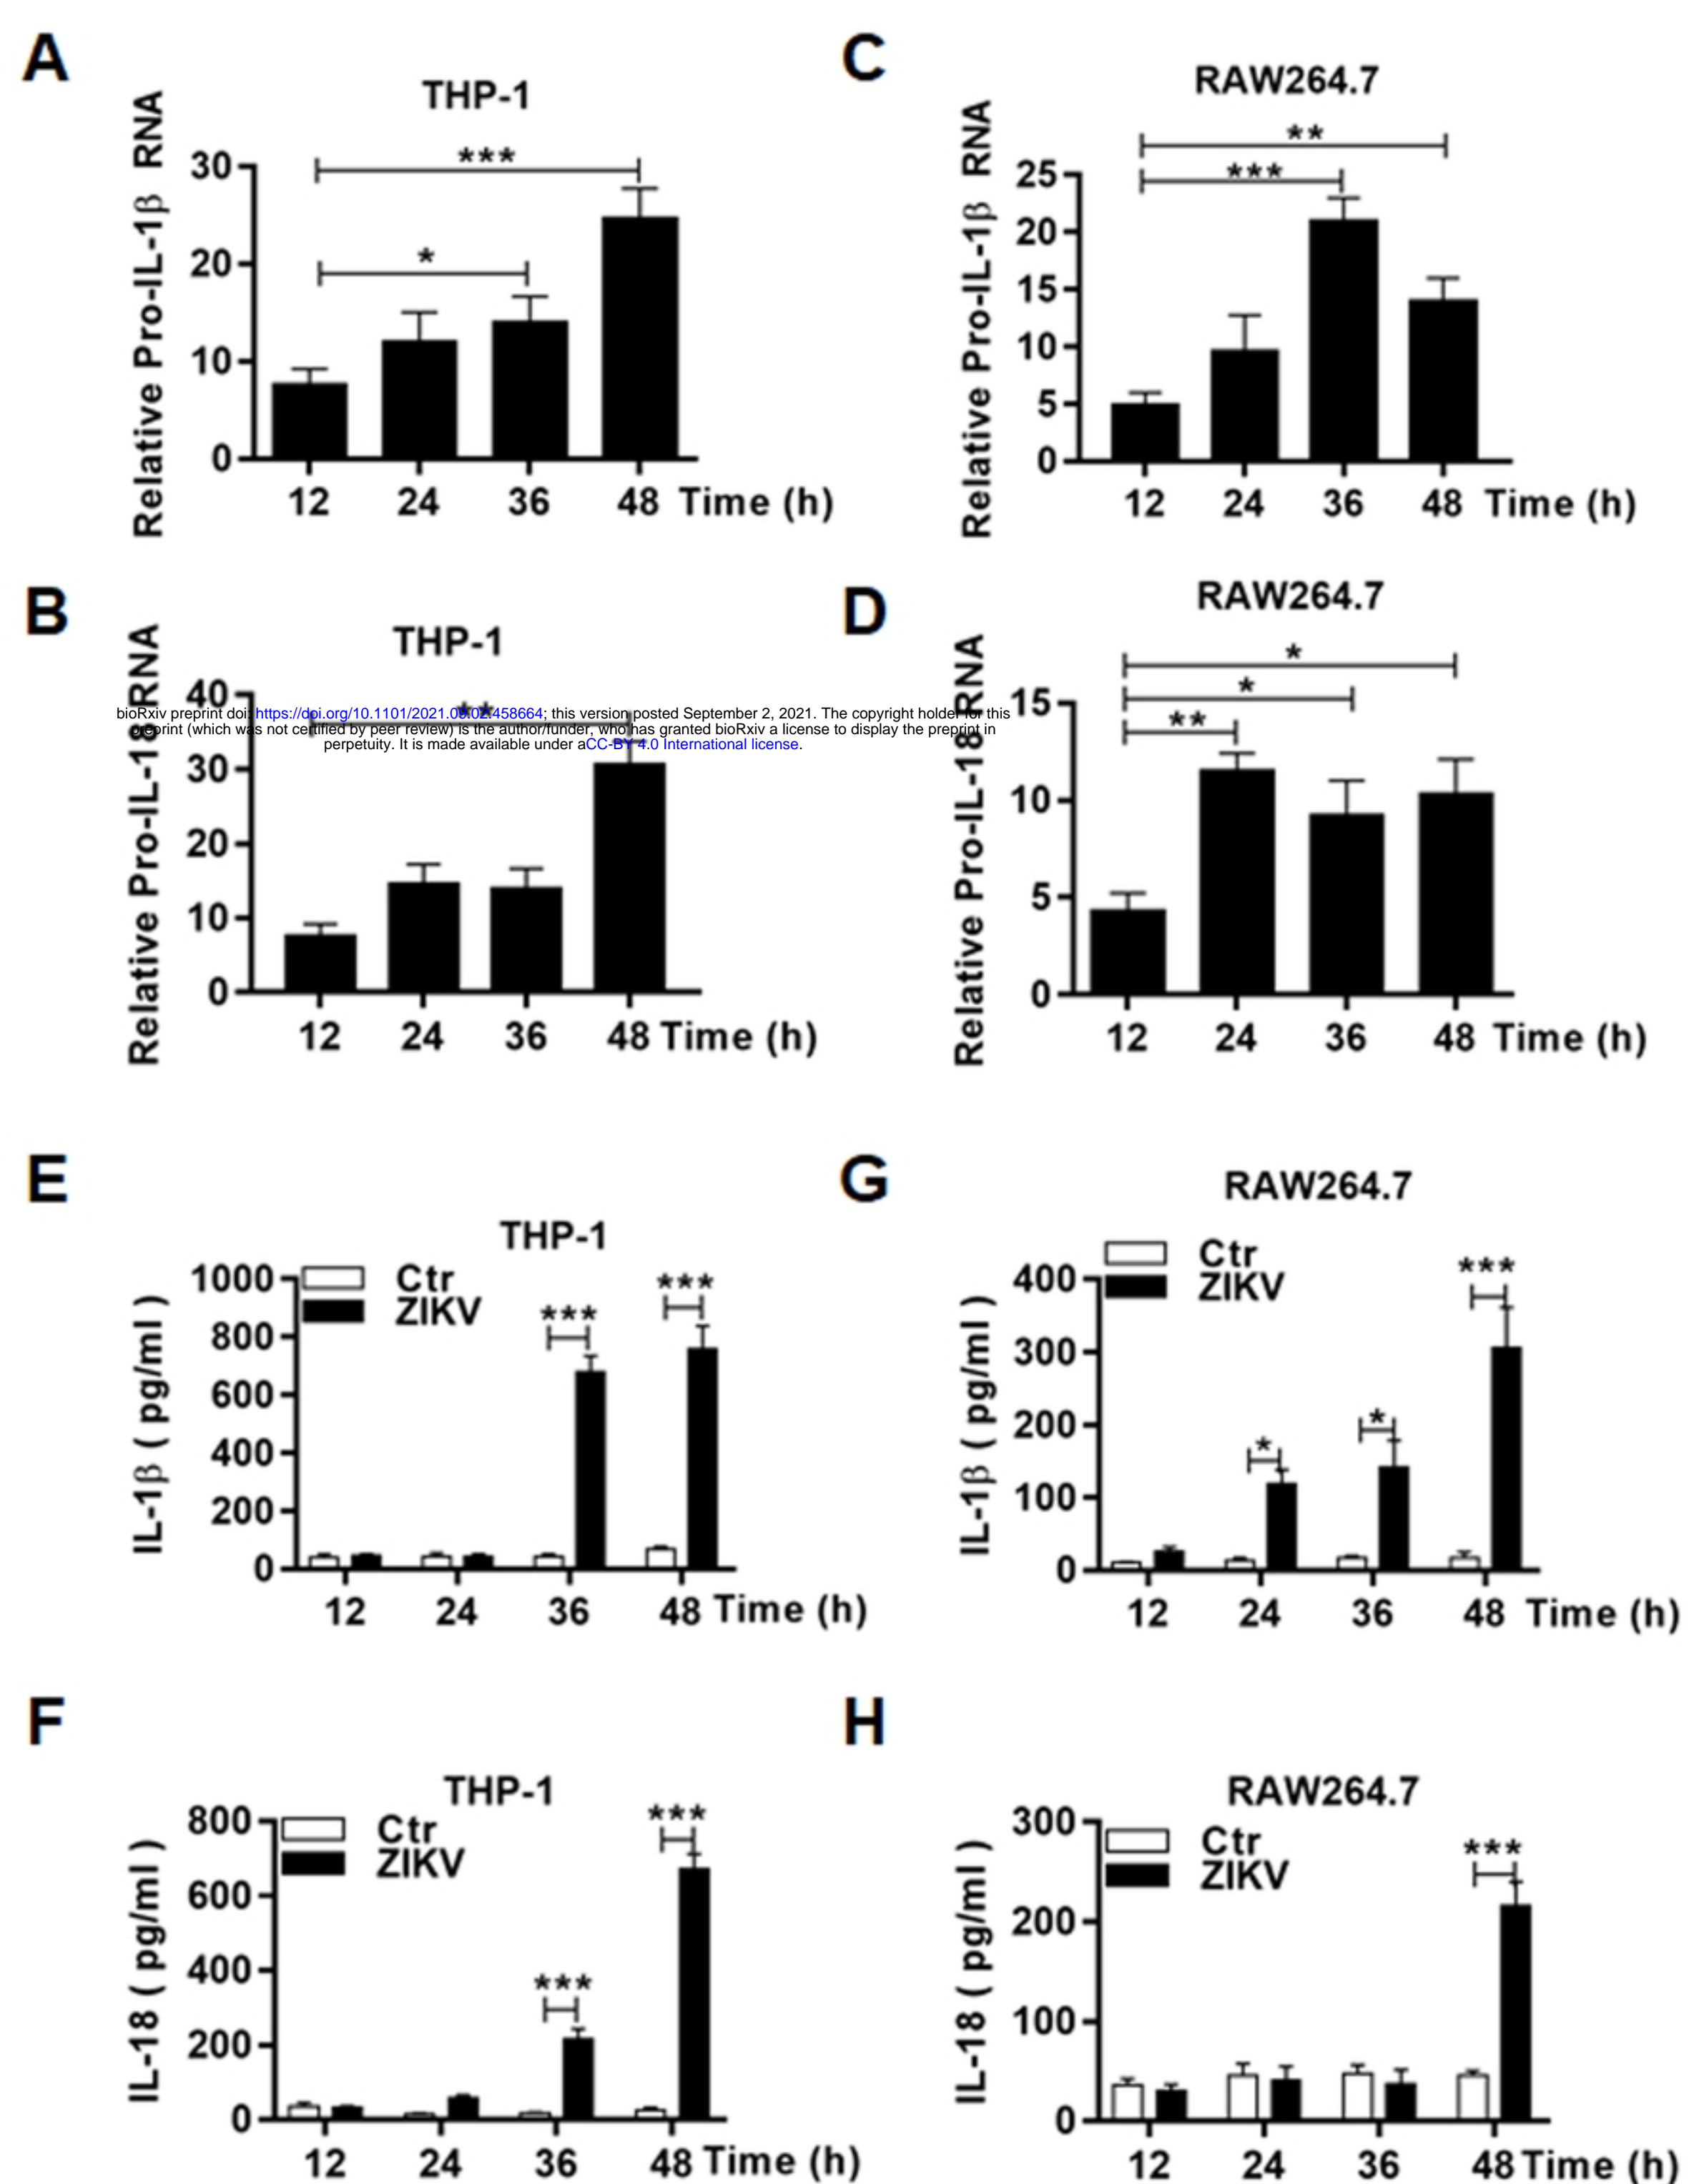

Figure 6

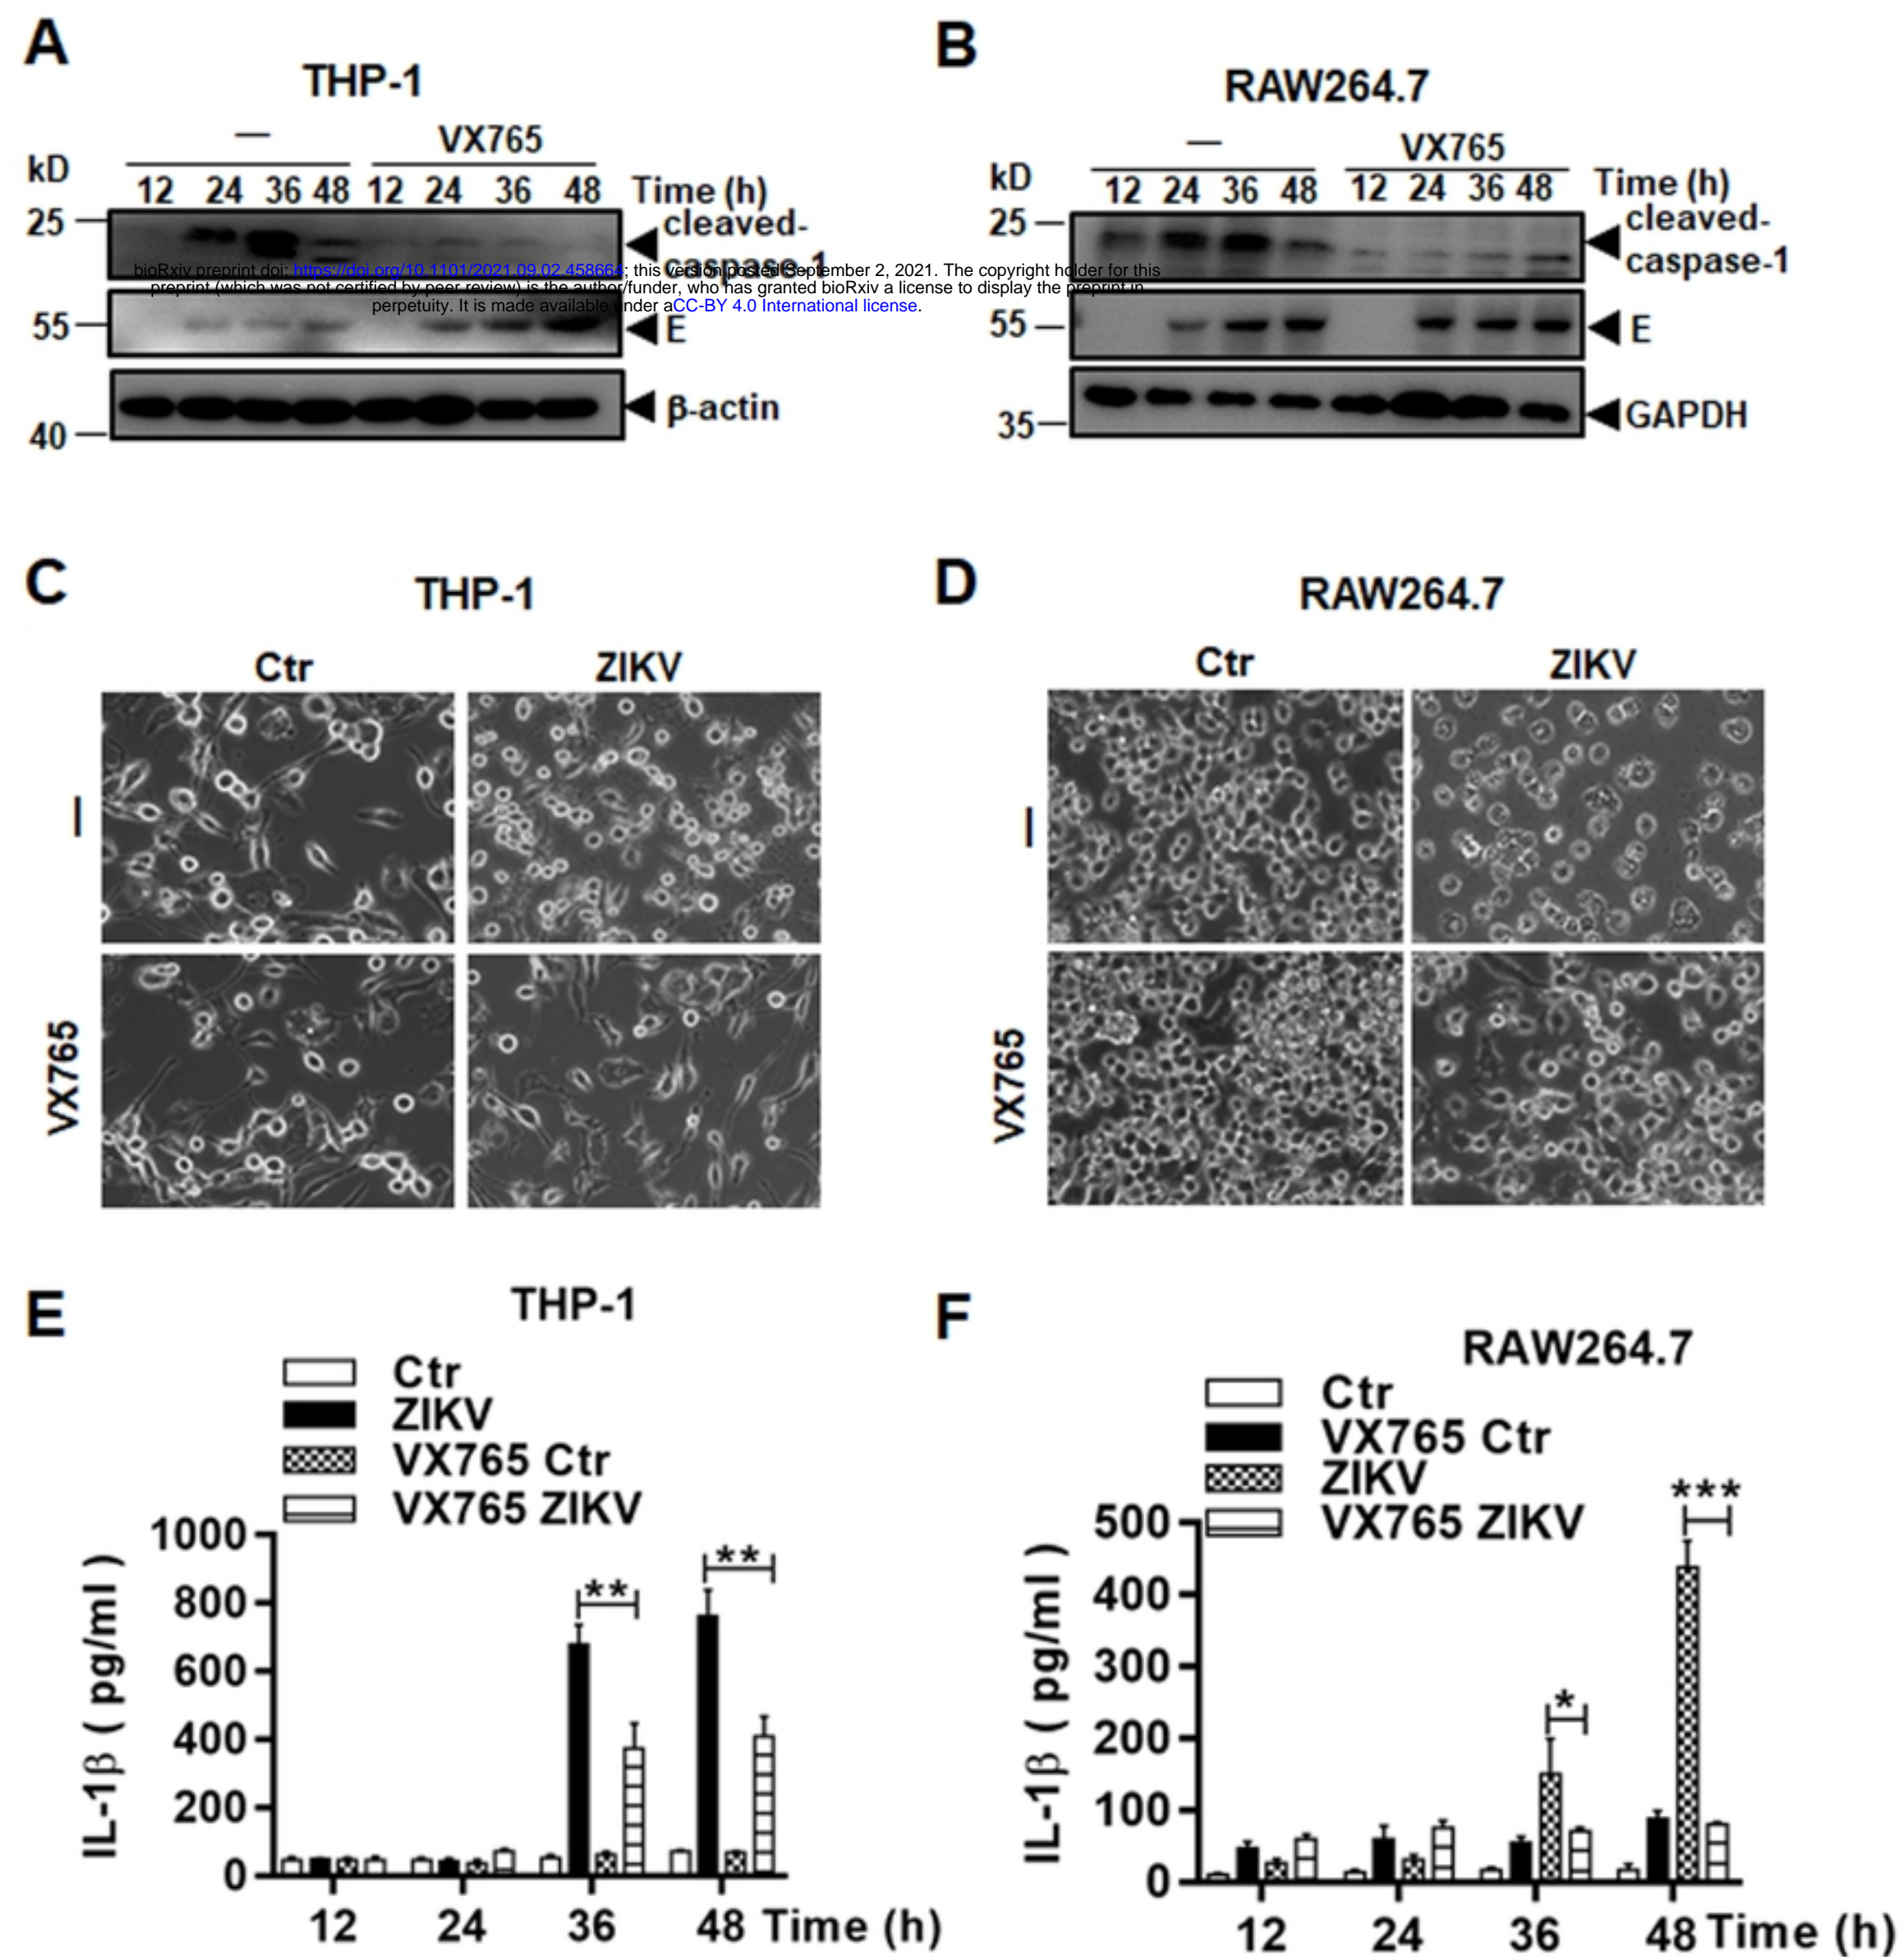

Figure 7

**A**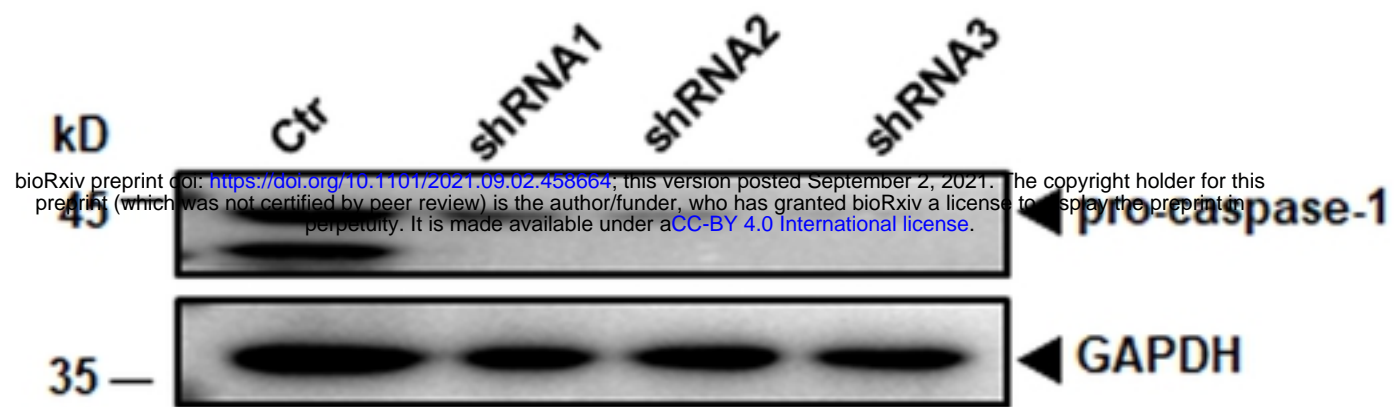**B**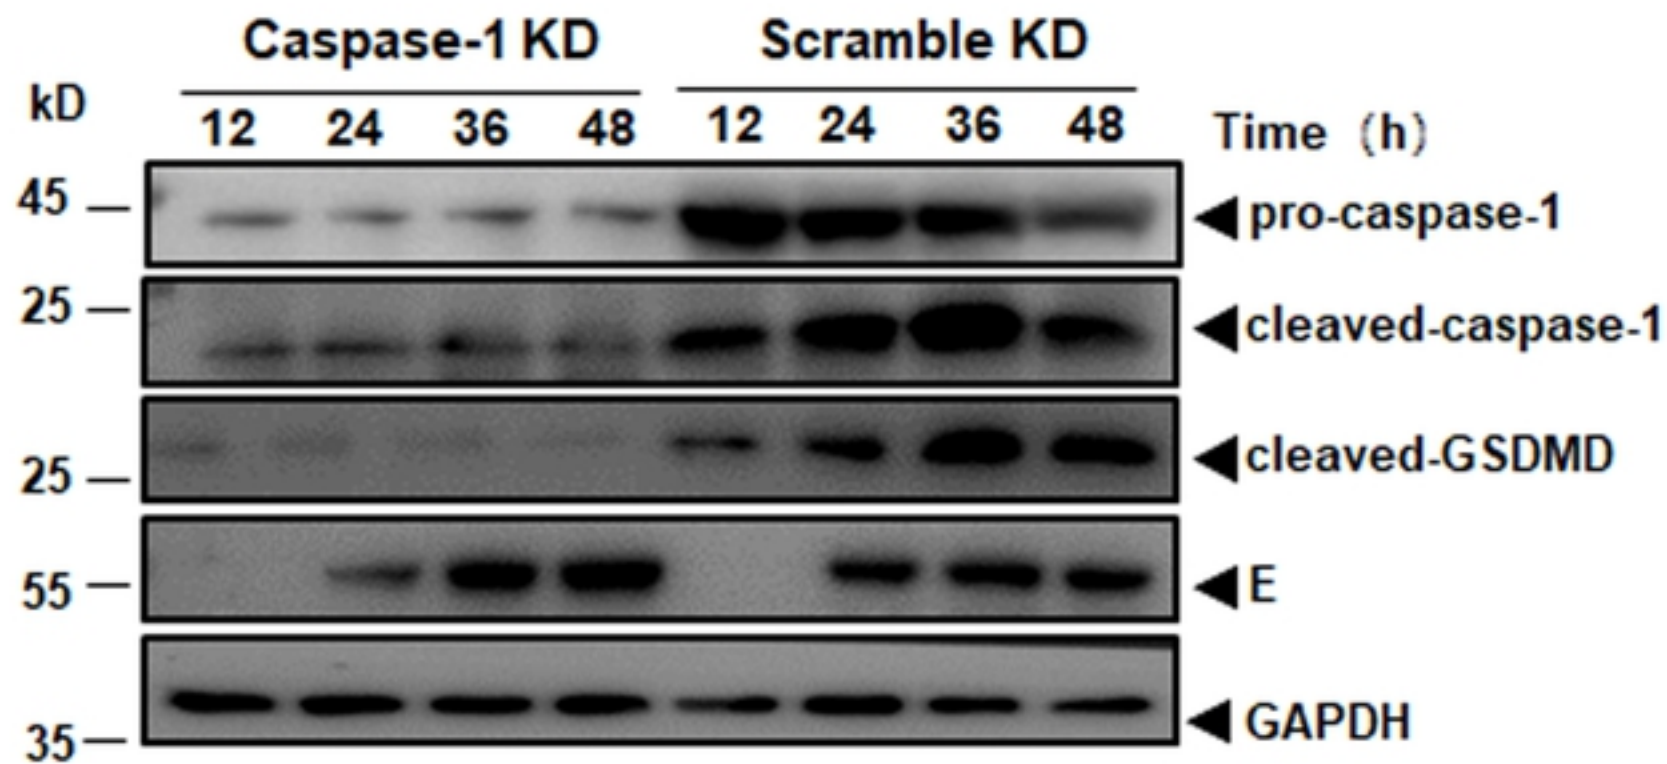**C**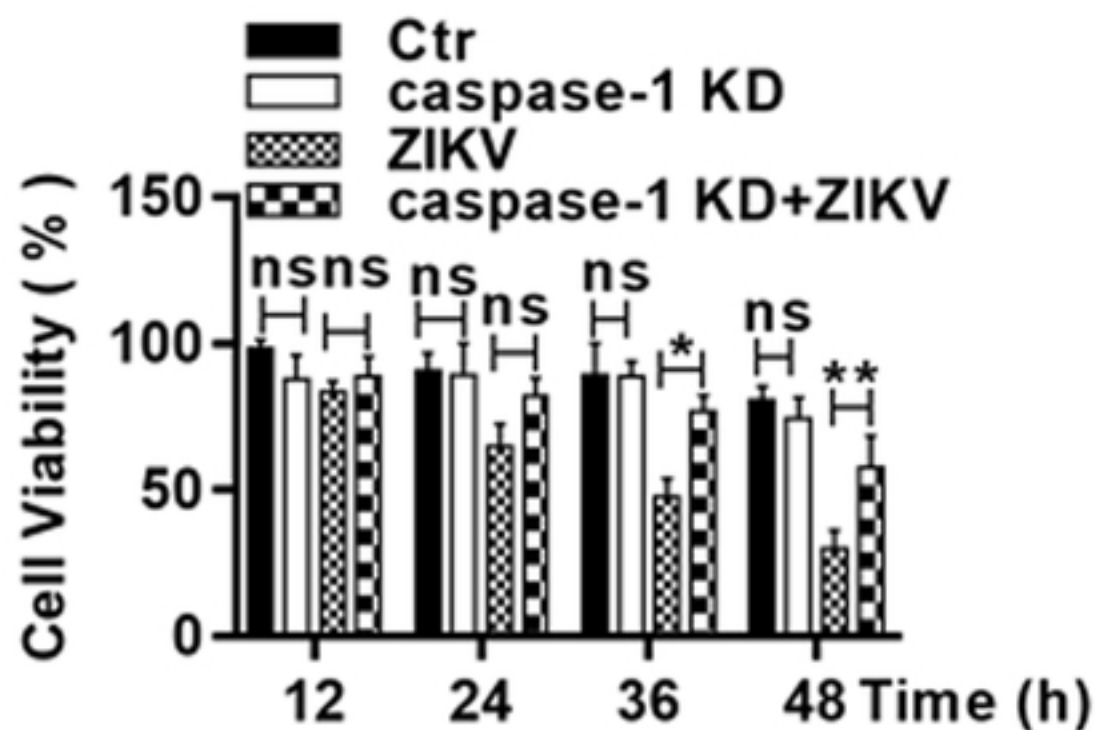**D**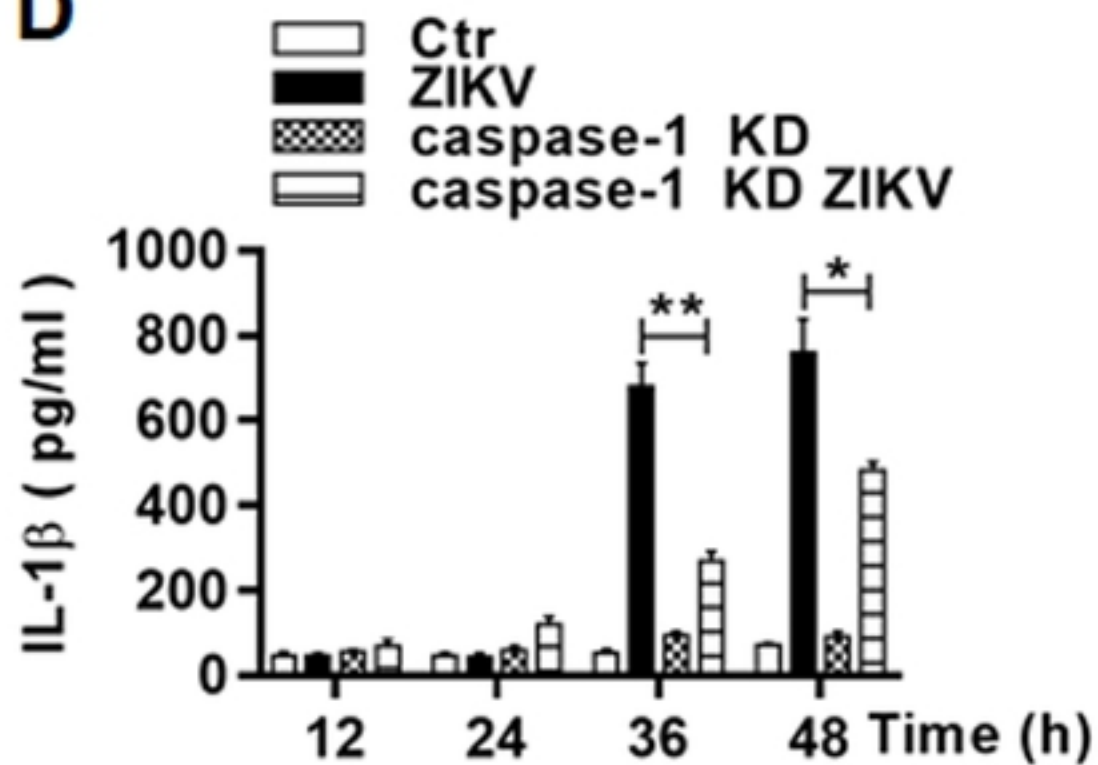

Figure 8

**A**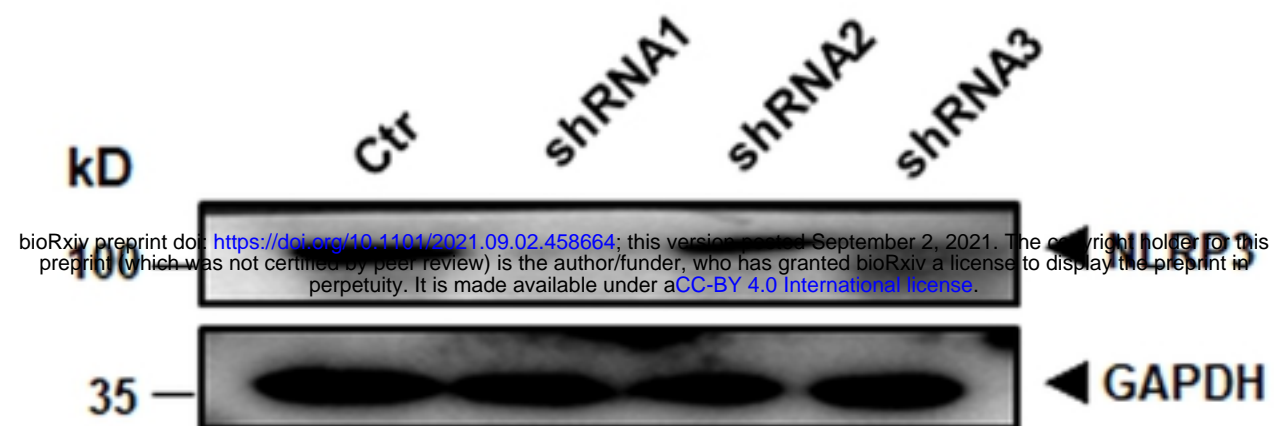**B**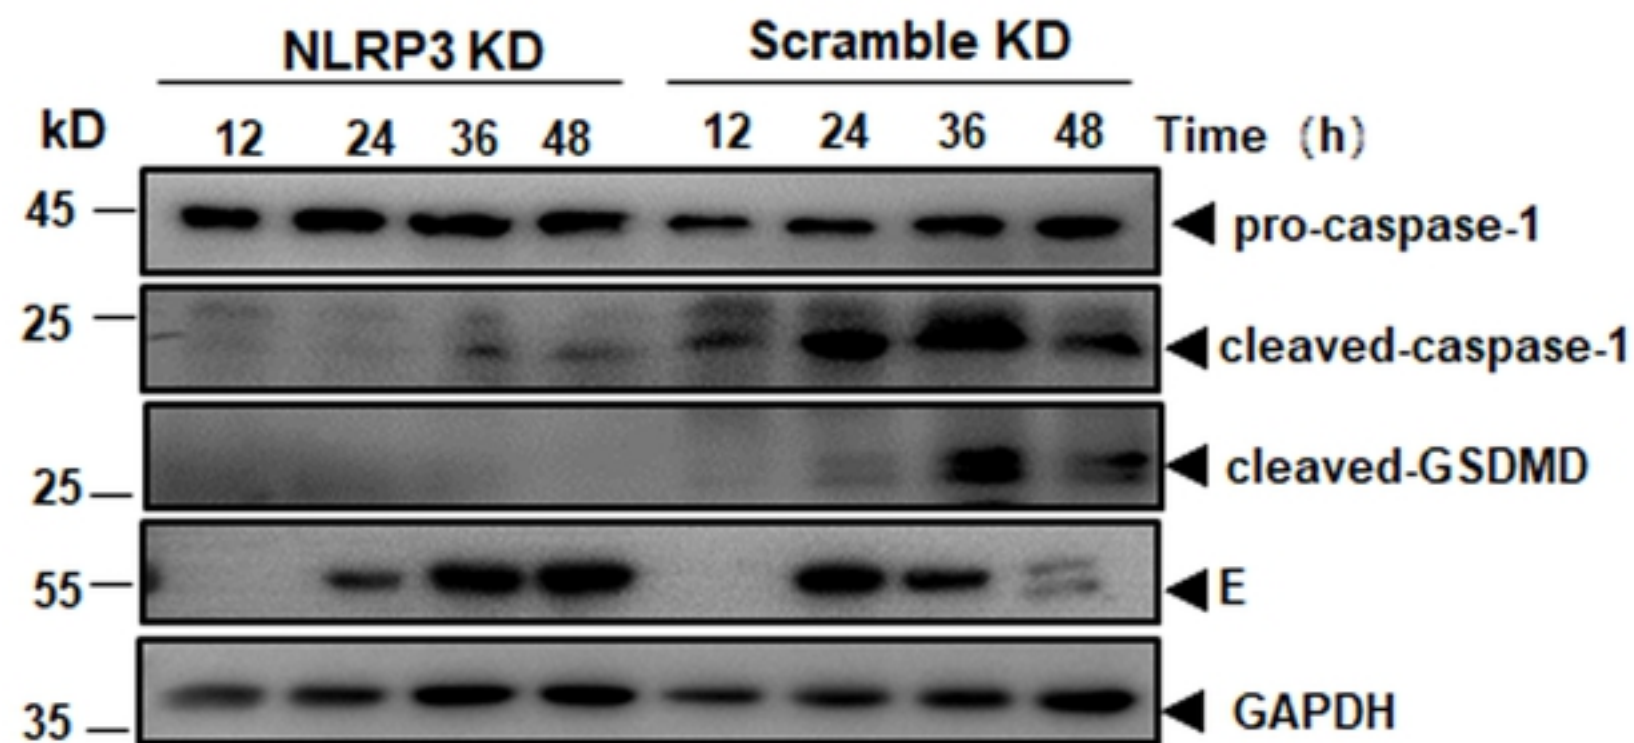**C**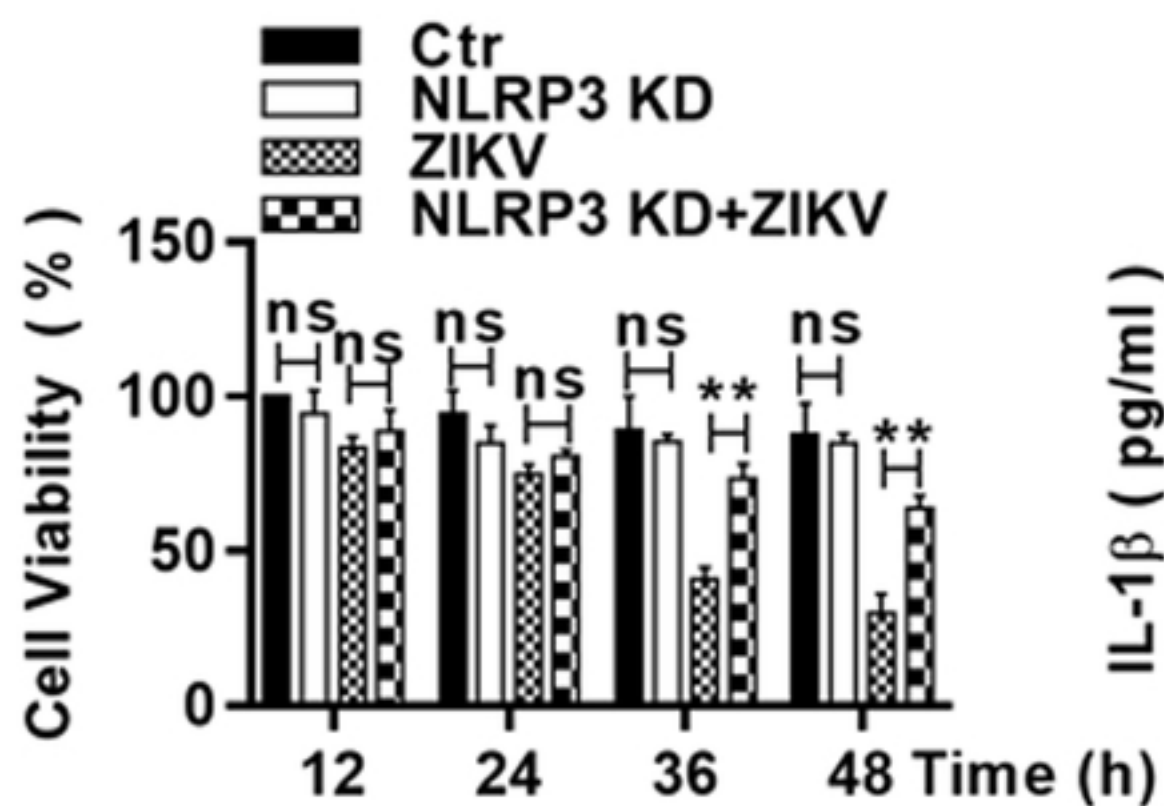**D**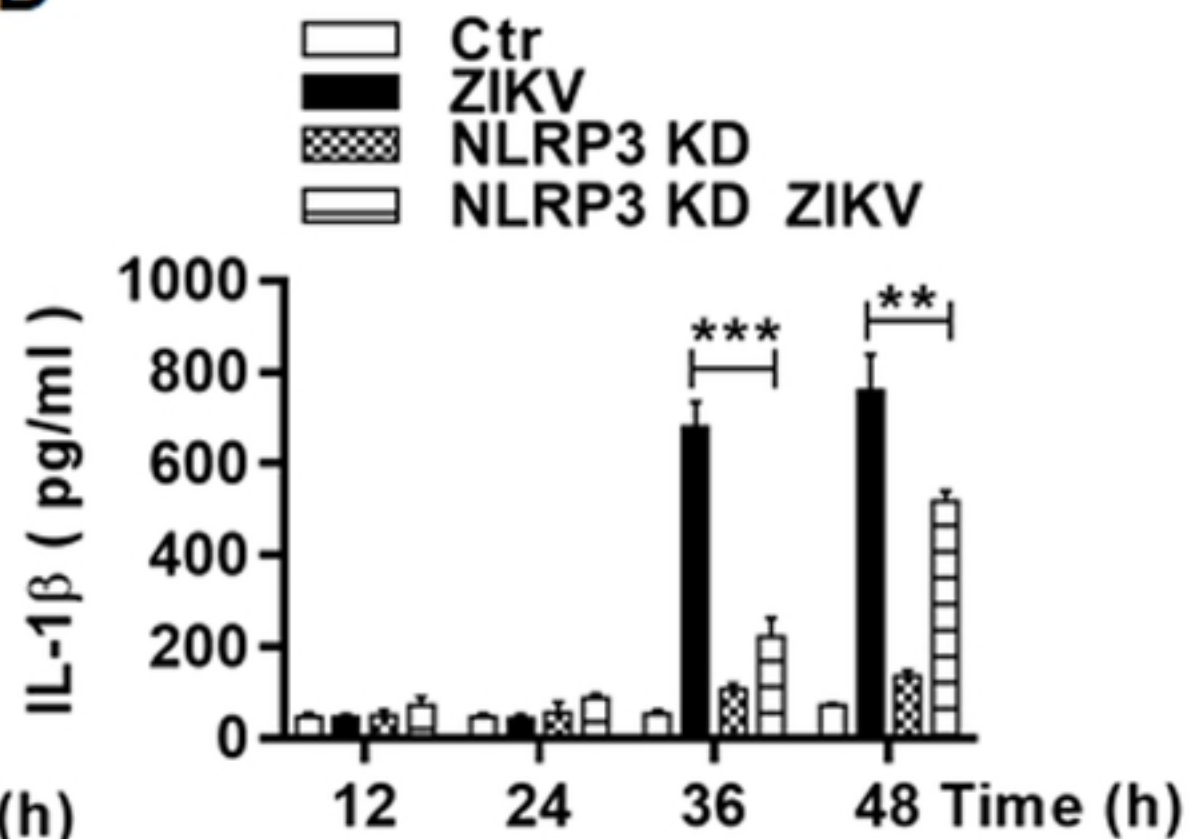

Figure 9
